## RESEARCH ARTICLE

## The current status of neglected tropical diseases in Japan: A scoping review

Yuriko Harada<sup>1</sup>, Hanako Iwashita<sup>1</sup>, Taeko Moriyasu<sup>2</sup>, Sachiyo Nagi<sup>1,3</sup>, Nobuo Saito<sup>4</sup>, Mariko Sugawara-Mikami<sup>5,6</sup>, Kota Yoshioka<sup>7,8</sup>\*, Rie Yotsu<sup>7,9,10</sup>, on behalf of Japan NTD Study Group

**1** Department of Hygiene and Public Health, Tokyo Women's Medical University, Tokyo, Japan, **2** Office for Global Relations, Nagasaki University, Nagasaki, Japan, **3** Department of Parasitology, Institute of Tropical Medicine (NEKKEN), Nagasaki University, Nagasaki, Japan, **4** Department of Microbiology, Faculty of Medicine, Oita University, Oita, Japan, **5** West Yokohama Sugawara Dermatology Clinic, Kanagawa, Japan, **6** Department of Clinical Laboratory Science, Faculty of Medical Technology, Teikyo University, Tokyo, Japan, **7** School of Tropical Medicine and Global Health, Nagasaki University, Nagasaki, Japan, **8** Interfaculty Initiative in Planetary Health, Nagasaki University, Nagasaki, Japan, **9** Department of Tropical Medicine and Infectious Disease, Tulane School of Public Health and Tropical Medicine, New Orleans, Louisiana, United States of America, **10** Department of Dermatology, National Center for Global Health and Medicine, Tokyo, Japan

\* These authors contributed equally to this work.

\* [k-yoshi@nagasaki-u.ac.jp](mailto:k-yoshi@nagasaki-u.ac.jp)

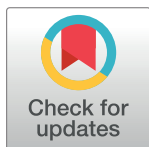

## OPEN ACCESS

**Citation:** Harada Y, Iwashita H, Moriyasu T, Nagi S, Saito N, Sugawara-Mikami M, et al. (2024) The current status of neglected tropical diseases in Japan: A scoping review. *PLoS Negl Trop Dis* 18(1): e0011854. <https://doi.org/10.1371/journal.pntd.0011854>

**Editor:** Olaf Horstick, University of Heidelberg, GERMANY

**Received:** January 17, 2023

**Accepted:** December 11, 2023

**Published:** January 2, 2024

**Copyright:** © 2024 Harada et al. This is an open access article distributed under the terms of the [Creative Commons Attribution License](https://creativecommons.org/licenses/by/4.0/), which permits unrestricted use, distribution, and reproduction in any medium, provided the original author and source are credited.

**Data Availability Statement:** All relevant data are within the manuscript and its [Supporting Information](#) files.

**Funding:** KY received funding from the School of Tropical Medicine and Global Health, Nagasaki University, for publication of this article. The funder did not play any role in the study design, data collection and analysis, decision to publish, or preparation of the manuscript.

**Competing interests:** The authors have declared that no competing interests exist.

## Abstract

Little attention has been paid to neglected tropical diseases (NTDs) in high-income countries and no literature provides an overview of NTDs in Japan. This scoping review aims to synthesize the latest evidence and information to understand epidemiology of and public health response to NTDs in Japan. Using three academic databases, we retrieved articles that mentioned NTDs in Japan, written in English or Japanese, and published between 2010 and 2020. Websites of key public health institutions and medical societies were also explored. From these sources of information, we extracted data that were relevant to answering our research questions. Our findings revealed the transmission of alveolar echinococcosis, Buruli ulcer, Chagas disease, dengue, foodborne trematodiasis, mycetoma, scabies, and soil-transmitted helminthiasis as well as occurrence of snakebites within Japan. Other NTDs, such as chikungunya, cystic echinococcosis, cysticercosis, leishmaniasis, leprosy, lymphatic filariasis, rabies, and schistosomiasis, have been imported into the country. Government agencies tend to organize surveillance and control programs only for the NTDs targeted by the Infectious Disease Control Law, namely, echinococcosis, rabies, dengue, and chikungunya. At least one laboratory offers diagnostic testing for each NTD except for dracunculiasis, human African trypanosomiasis, onchocerciasis, and yaws. No medicine is approved for treatment of Chagas disease and fascioliasis and only off-label use drugs are available for cysticercosis, opisthorchiasis, human African trypanosomiasis, onchocerciasis, schistosomiasis, and yaws. Based on these findings, we developed disease-specific recommendations. In addition, three policy issues are discussed, such as lack of legal frameworks to organize responses to some NTDs, overreliance on researchers to procure some NTD products, and unaffordability of unapproved NTD medicines. Japan should recognize the presence of NTDs within the country and need to address them as a

national effort. The implications of our findings extend beyond Japan, emphasizing the need to study, recognize, and address NTDs even in high-income countries.

### Author summary

Neglected tropical diseases (NTDs) are an umbrella term for 20 diseases and disease groups recognized by the World Health Organization. Although NTDs are usually considered to be a public health problem in low- and middle-income countries, people living in high-income countries could also be affected. In this scoping review, we aimed to summarize the latest evidence and information to understand the epidemiology of and public health response to NTDs in Japan. Japan officially reported a yearly average of 340 NTD cases between 2014 and 2017; however, we found that it does not accurately reflect the current status of NTDs in the country. Our review suggests that 15 of 20 NTDs can be considered to be important public health concerns. While echinococcosis, chikungunya, dengue, and rabies are under control by law, many other NTDs are largely neglected by Japan's health systems and solely addressed by a limited number of physicians and researchers. We recommend that the Government of Japan should assume responsibility for enhancing surveillance, expanding access to diagnostics and medicines, and ensuring affordability of unapproved NTD drugs.

### Introduction

The World Health Organization (WHO) recognizes 20 diseases and disease groups as neglected tropical diseases (NTDs), which mainly affect people living in poverty [1]. NTDs accounted for approximately one percent of the global disease burden in 2012 [2] and at least 1.74 billion people require interventions against NTDs worldwide [1]. The United Nations' Sustainable Development Goals (SDGs) include ending the epidemics of NTDs by 2030 as one of the global priorities [3].

Although NTDs are usually regarded as a public health problem in low- and middle-income countries, people living in high-income countries could be affected as well [4]. Hotez (2013) developed a concept of "blue marble health," meaning that there is a paradoxical burden of NTDs among the poor living in wealthy countries [5]. Some underlying factors, including human migration [6] and climate change [7], are driving changes in the global distribution of NTDs. Researchers have investigated NTDs in high-income countries, for example in Italy [8, 9] and the United States [10]. High-income countries are no longer free from NTDs; Japan is no exception.

Little is known about the current status of NTDs in Japan. According to the Japan SDGs Action Platform run by the Ministry of Foreign Affairs of Japan, a yearly average of 340 NTD cases was reported between 2014 and 2017, which included cases of Buruli ulcer, cysticercosis, dengue, echinococcosis, foodborne trematodiasis, leprosy, scabies, snakebite envenoming, and soil-transmitted helminthiasis [11]. However, this is not a comprehensive case number because not all NTDs are reportable in Japan. To our knowledge, no literature has provided an overall situation of NTDs in Japan to date.

This scoping review aims to synthesize the latest evidence and information to understand epidemiology of and public health response to NTDs in Japan. To achieve this aim, the following guiding questions were addressed for each NTD: 1) What is the prevalence or incidence?;

2) How many cases are reported to the government bodies?; 3) Is the disease transmitted within Japan?; 4) Is any imported human case to Japan reported?; 5) Is there any human case surveillance implemented by the government bodies?; 6) Is there any control program implemented by government bodies?; 7) Is there any laboratory offering testing services for diagnosis?; and 8) Is there any vaccine or medicine available? Based on the findings, we also intend to develop recommendations to advance policy and research agenda for NTDs in Japan.

## Methods

Our paper takes the form of scoping review. A scoping review is a useful research tool when the purpose of the review is to identify the types of available evidence or to scope a body of literature in a given field [12]. Our aim of synthesizing knowledge and information regarding NTDs in Japan justifies our choice of performing a scoping review. In reporting this study, we followed the recommendations of PRISMA Extension for Scoping Reviews (PRISMA ScR) [13]. We described the PRISMA ScR Flowchart in Fig 1.

We developed a draft search protocol together including all authors of the Japan NTD Study Group. Two researchers independently tested the protocol by applying it to leishmaniasis and the other two researchers to scabies. We had a group discussion to compare the search results and revised the protocol until we reached a consensus. Once the protocol was established, one author was assigned to each NTD to collect data from the literature and websites. The same researcher synthesized the search results into a narrative. The narrative of each NTD was finally reviewed and revised by all authors. The following paragraphs describe our protocol in detail.

For our literature search, we used three online databases, namely, PubMed, Ichushi-Web, and Medical\*Online. Ichushi-Web and Medical\*Online are commonly used to search medical articles written in Japanese. Using the search strategy shown in S1 Document, we retrieved publications that met all of our inclusion criteria: 1) original research articles, clinical case reports, reviews, expert opinions, and commentaries that provide information about NTDs in Japan, 2) published in English or Japanese, and 3) published between January 1st, 2010 and December 31st, 2020. Then, we manually scanned the titles and abstracts of the retrieved articles and excluded articles that met any of our exclusion criteria: 1) an article focusing on the biology of pathogens, 2) an article focusing on product development, and 3) an article focusing on NTDs in countries other than Japan. Zotero (Corporation for Digital Scholarship, VA, USA) was used to store selected articles. As a data charting process, each researcher assessed the relevance of evidence in terms of our eight guiding questions. If the source of evidence included any information relevant to answering the guiding questions, we extracted that data for synthesis.

For the website search, we first browsed the Japanese government's portal site [14] to identify laws framing responses to any NTDs, such as the Act on the Prevention of Infectious Diseases and Medical Care for Patients with Infectious Diseases (hereafter, the Infectious Diseases Control Law). When a disease is designated by the Infectious Diseases Control Law, that disease is subject to the national surveillance system. Second, we explored the Infectious Diseases Weekly Report [15], issued by the National Institute of Infectious Diseases (NIID) to identify notifications of NTDs between 2010 to 2020. Lastly, we collected information about the availability of vaccines, diagnostic testing, and medicines for NTDs in Japan. For vaccines, we searched the database of the Pharmaceuticals and Medical Devices Agency (PMDA) [16], a regulatory agency in Japan, to identify vaccine products approved in Japan. For diagnosis, the availability of diagnostic testing of any NTDs was searched based on the NIID's Manual for the Detection of Pathogen [17] and an on-line directory named "Infectious Diseases Map for

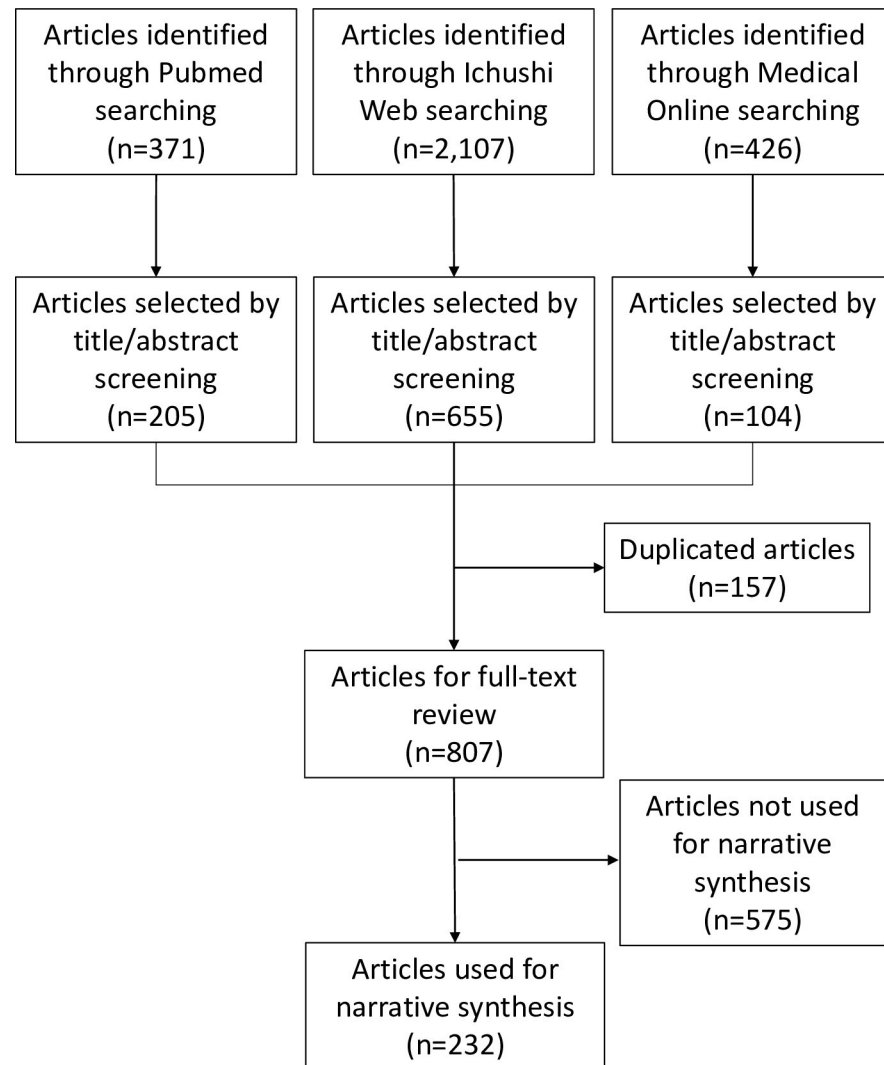

**Fig 1. PRISMA ScR Flowchart.**

<https://doi.org/10.1371/journal.pntd.0011854.g001>

Advanced Progressive Laboratory Tests (IDMA)” [18], which is co-provided by the Japanese Association for Infectious Diseases and the Japanese Society for Clinical Microbiology. For medicines, we identified generic names of NTD medicines recommended by WHO using its Model List of Essential Medicine [19] or Fact Sheets [20], and then, checked whether that medicine has been approved by PMDA. We also looked into the website of the Research Group of Tropical Diseases and Parasitic Diseases [21] as this research group supplies some unapproved medicines for treatment of tropical diseases. In writing the Result section, we omitted citations to these websites to avoid redundancy.

For synthesis, each researcher used Table 1 to check whether she or he could collect data to answer the guiding questions. Then, the researcher summarized the data by constructing a narrative about epidemiology of and public health response to each NTD. All researchers read every narrative and revised it until we reached a consensus. The final narratives are presented in the Result section.

Table 1. Summary of epidemiology of and response to neglected tropical diseases in Japan between 2010 and 2020.

| NTD (WHO category)            | NTD (sub-category)            | Epidemiology                                                                                     |                                                   |                                        |                                 | Response                                                   |                                                |                                                                      |                                                                                |
|-------------------------------|-------------------------------|--------------------------------------------------------------------------------------------------|---------------------------------------------------|----------------------------------------|---------------------------------|------------------------------------------------------------|------------------------------------------------|----------------------------------------------------------------------|--------------------------------------------------------------------------------|
|                               |                               | Estimation of incidence or prevalence                                                            | Number of cases reported to NIID (2010–2020) [15] | Any evidence of domestic transmission? | Any evidence of imported cases? | Any surveillance of human cases by government bodies? [14] | Any control program by government bodies? [14] | Any laboratory offering confirmatory testing for diagnosis? [17, 18] | At least one medicine approved by PMDA for treatment? [16]                     |
| Buruli ulcer                  |                               | n/a                                                                                              | 52 <sup>a</sup>                                   | Yes [22, 23]                           | No                              | Yes                                                        | No                                             | Yes                                                                  | Yes (rifampicin, clarithromycin <sup>b</sup> , and levofloxacin <sup>b</sup> ) |
| Chagas disease                |                               | 3,000–4,500 prevalent cases [24]                                                                 | -                                                 | Yes [24, 25]                           | Yes [26–31]                     | No                                                         | No                                             | Yes                                                                  | No                                                                             |
| Cysticercosis                 |                               | n/a                                                                                              | -                                                 | No                                     | Yes                             | No                                                         | No                                             | Yes                                                                  | Yes (albendazole <sup>b</sup> and praziquantel <sup>b</sup> )                  |
| Dengue/ Chikungunya           | Dengue                        | 200–300 imported cases per year (More than 4,000 imported asymptomatic cases are expected.) [32] | 2,755                                             | Yes [33, 34]                           | Yes [35, 36]                    | Yes                                                        | Yes                                            | Yes                                                                  | -                                                                              |
|                               | Chikungunya                   | n/a                                                                                              | 142 <sup>c</sup>                                  | No                                     | Yes [37, 38]                    | Yes                                                        | Yes                                            | Yes                                                                  | -                                                                              |
| Dracunculiasis                |                               | n/a <sup>d</sup>                                                                                 | -                                                 | No                                     | No                              | No                                                         | No                                             | No                                                                   | -                                                                              |
| Echinococcosis                | Alveolar echinococcosis       | n/a                                                                                              | 254                                               | Yes [39–45]                            | Yes [46]                        | Yes                                                        | Yes                                            | Yes                                                                  | Yes (albendazole)                                                              |
|                               | Cystic echinococcosis         | n/a                                                                                              | 10                                                | No                                     | Yes [47–54]                     | Yes                                                        | Yes                                            | Yes                                                                  | Yes (albendazole)                                                              |
| Foodborne trematodiasis       | Clonorchiasis, Paragonimiasis | n/a                                                                                              | -                                                 | Yes [55–58]                            | Yes [56–60]                     | No                                                         | No                                             | Yes                                                                  | Yes (praziquantel)                                                             |
|                               | Fascioliasis                  | n/a                                                                                              | -                                                 | Yes [61]                               | Yes [62, 63]                    | No                                                         | No                                             | Yes                                                                  | No                                                                             |
|                               | Opisthorchiasis               | n/a <sup>d</sup>                                                                                 | -                                                 | No                                     | No                              | No                                                         | No                                             | Yes                                                                  | Yes (praziquantel <sup>b</sup> )                                               |
| Human African trypanosomiasis |                               | n/a <sup>d</sup>                                                                                 | -                                                 | No                                     | No                              | No                                                         | No                                             | Yes (pentamidine <sup>b</sup> )                                      |                                                                                |
| Leishmaniasis                 |                               | n/a                                                                                              | -                                                 | No                                     | Yes [64–70]                     | No                                                         | No                                             | Yes                                                                  | Yes (amphotericin B and paromomycin sulfate <sup>b</sup> )                     |
| Leprosy                       |                               | Nearly zero new patients (among Japanese) [71]                                                   | 41                                                | No                                     | Yes [71–75]                     | Yes                                                        | No                                             | Yes                                                                  | Yes (rifampicin, dapsone, and clofazimine)                                     |
| Lymphatic filariasis          |                               | n/a                                                                                              | -                                                 | No                                     | Yes [76, 77]                    | No                                                         | No                                             | Yes                                                                  | Yes (ivermectin <sup>b</sup> and albendazole <sup>b</sup> )                    |

(Continued)

Table 1. (Continued)

| NTD (WHO category)             | NTD (sub-category)      | Epidemiology                                  |                                                   |                                        |                                 | Response                                                   |                                                |                                                                      |                                                                        |
|--------------------------------|-------------------------|-----------------------------------------------|---------------------------------------------------|----------------------------------------|---------------------------------|------------------------------------------------------------|------------------------------------------------|----------------------------------------------------------------------|------------------------------------------------------------------------|
|                                |                         | Estimation of incidence or prevalence         | Number of cases reported to NIID (2010–2020) [15] | Any evidence of domestic transmission? | Any evidence of imported cases? | Any surveillance of human cases by government bodies? [14] | Any control program by government bodies? [14] | Any laboratory offering confirmatory testing for diagnosis? [17, 18] | At least one medicine approved by PMDA for treatment? [16]             |
| Mycetoma                       | Mycetoma                | n/a                                           | -                                                 | Yes [78, 79]                           | No                              | No                                                         | No                                             | Yes                                                                  | Yes (itraconazole <sup>b</sup> )                                       |
|                                | Chromoblastomycosis     | n/a                                           | -                                                 | Yes [80–83]                            | Yes [81]                        | No                                                         | No                                             | Yes                                                                  | Yes (itraconazole)                                                     |
|                                | Sporotrichosis          | n/a                                           | -                                                 | Yes [84–87]                            | No                              | No                                                         | No                                             | Yes                                                                  | Yes (itraconazole, amphotericin B <sup>b</sup> , and potassium iodide) |
|                                | Paracoccidioidomycosis  | n/a                                           | -                                                 | No                                     | Yes [88]                        | No                                                         | No                                             | Yes                                                                  | Yes (itraconazole <sup>b</sup> )                                       |
| Onchocerciasis                 |                         | n/a <sup>d</sup>                              | -                                                 | No                                     | No                              | No                                                         | No                                             | No                                                                   | Yes (ivermectin <sup>b</sup> )                                         |
| Rabies                         |                         | Zero incidence <sup>e</sup> [89]              | 1                                                 | No                                     | Yes [89]                        | Yes                                                        | Yes                                            | Yes                                                                  | - <sup>f</sup>                                                         |
| Scabies                        |                         | 80,000–150,000 incident cases per year [90]   | -                                                 | Yes [91–98]                            | Yes [94]                        | No                                                         | No                                             | Yes                                                                  | Yes (ivermectin)                                                       |
| Schistosomiasis                |                         | n/a                                           | -                                                 | No                                     | Yes [99–107]                    | No                                                         | Yes                                            | Yes                                                                  | Yes (praziquantel <sup>b</sup> )                                       |
| Snakebites                     |                         | 1,000–3,000 incident cases per year [108–110] | -                                                 | Yes [111–127]                          | No                              | Yes <sup>g</sup>                                           | No                                             | -                                                                    | Yes (Freeze-dried antivenoms <sup>h</sup> )                            |
| Soil-transmitted helminthiasis | Ascariasis <sup>i</sup> | n/a                                           | -                                                 | No <sup>j</sup>                        | No <sup>j</sup>                 | No                                                         | No                                             | Yes                                                                  | Yes (pyrantel and albendazole <sup>b</sup> )                           |
|                                | Trichuriasis            | n/a                                           | -                                                 | No                                     | Yes [128]                       | No                                                         | No                                             | Yes                                                                  | Yes (mebendazole and albendazole <sup>b</sup> )                        |
|                                | Necatoriasis            | n/a                                           | -                                                 | No <sup>j</sup>                        | No <sup>j</sup>                 | No                                                         | No                                             | Yes                                                                  | Yes (pyrantel and albendazole <sup>b</sup> )                           |
|                                | Strongyloidiasis        | At least 15 cases found per year [129]        | -                                                 | Yes [130]                              | Yes [131]                       | No                                                         | No                                             | Yes                                                                  | Yes (ivermectin and albendazole <sup>b</sup> )                         |
| Trachoma                       |                         | n/a <sup>d</sup>                              | -                                                 | No                                     | No                              | No                                                         | No                                             | Yes                                                                  | Yes (azithromycin and tetracycline)                                    |

(Continued)

Table 1. (Continued)

| NTD (WHO category) | NTD (sub-category) | Epidemiology                          |                                                   |                                        |                                 | Response                                                   |                                                |                                                                      |                                                                         |
|--------------------|--------------------|---------------------------------------|---------------------------------------------------|----------------------------------------|---------------------------------|------------------------------------------------------------|------------------------------------------------|----------------------------------------------------------------------|-------------------------------------------------------------------------|
|                    |                    | Estimation of incidence or prevalence | Number of cases reported to NIID (2010–2020) [15] | Any evidence of domestic transmission? | Any evidence of imported cases? | Any surveillance of human cases by government bodies? [14] | Any control program by government bodies? [14] | Any laboratory offering confirmatory testing for diagnosis? [17, 18] | At least one medicine approved by PMDA for treatment? [16]              |
| Yaws               |                    | n/a <sup>d</sup>                      | -                                                 | No                                     | No                              | No                                                         | No                                             | No                                                                   | Yes (azithromycin <sup>b</sup> and benzathine penicillin <sup>b</sup> ) |

## Abbreviations

NIID: National Institute of Infectious Diseases

PMDA: Pharmaceuticals and Medical Devices Agency

## Legend

-: Not applicable.

n/a: Data not available.

## Notes

<sup>a</sup> Data not available for 2018–2020.<sup>b</sup> For off-label use only.<sup>c</sup> Data not available for 2010.<sup>d</sup> The incidence and prevalence are probably zero since no evidence suggests either domestic transmission or importation.<sup>e</sup> Rabies is eliminated in Japan, but one imported case was exceptionally found in 2020.<sup>f</sup> Vaccines are approved by PMDA for pre- and post-exposure prophylaxis but rabies immune globulins are unapproved.<sup>g</sup> Surveillance of habu bites in Kagoshima and Okinawa only.<sup>h</sup> Yamakagashi antivenom is not approved by PMDA.<sup>i</sup> Not including *Ascaris suum* infections.<sup>j</sup> *Ascaris* and *Necator* infections are found in Japan [132, 133] but it is not clear where and when the transmission occurred.<https://doi.org/10.1371/journal.pntd.0011854.t001>

## Results

As Fig 1 shows, a total of 807 articles across 20 NTDs met our inclusion and exclusion criteria (see the numbers of selected articles for each disease in S1 Document). A full list of these 807 articles can be found in S2 Document. Among them, we used 232 articles for the narrative synthesis. In this Result section, we provided key findings from our review by disease area, following our guiding questions. Key findings are summarized in Table 1. A map of Japan showing the locations of prefectures mentioned in this review can be found in S3 Document.

### Buruli ulcer

**Epidemiology.** Buruli ulcer is an infectious disease caused by *Mycobacterium ulcerans*. The route of infection is still unknown [134] and human-to-human transmission has not been reported globally [135]. In Japan, the first case was found in 1979 in which a 19-year-old female with no travel history was diagnosed with the infection of *M. ulcerans* subsp. *shinshuense* (Mikoshihba et al. (1982) cited by [22]). Since then, a total of 75 cases have been reported to the Leprosy Research Center (LRC) at NIID by the end of 2020, with an average of one to three cases per year (Table 2). A concentration of cases has been observed in the central western region, especially in Okayama Prefecture. As with the first case, all reported cases have been ulcerated cases caused by *M. ulcerans* subsp. *shinshuense* [136, 137]. This subspecies differs from those identified in West Africa and Australia where the disease is also reported and

**Table 2. Number of NTD cases reported to the National Institute of Infectious Diseases between 1999 and 2020.**

| Year                     | 1999 | 2000 | 2001 | 2002 | 2003 | 2004 | 2005 | 2006 | 2007 | 2008 | 2009 | 2010 | 2011 | 2012 | 2013 | 2014 | 2015 | 2016 | 2017 | 2018 | 2019 | 2020 |
|--------------------------|------|------|------|------|------|------|------|------|------|------|------|------|------|------|------|------|------|------|------|------|------|------|
| Buruli ulcer             |      |      |      |      |      | 1    | 1    | 1    | 3    | 2    | 5    | 9    | 10   | 4    | 10   | 7    | 4    | 2    | 6    |      |      |      |
| Chikungunya              |      |      |      |      |      |      |      |      |      |      |      |      | 10   | 10   | 14   | 16   | 17   | 14   | 5    | 4    | 49   | 3    |
| Dengue                   | 9    | 18   | 50   | 52   | 32   | 49   | 74   | 58   | 89   | 104  | 93   | 244  | 113  | 221  | 249  | 341  | 293  | 342  | 245  | 201  | 461  | 45   |
| Echinococcosis, alveolar | 6    | 20   | 13   | 8    | 20   | 25   | 18   | 19   | 23   | 23   | 26   | 19   | 22   | 15   | 19   | 28   | 27   | 27   | 29   | 18   | 27   | 23   |
| Echinococcosis, cystic   | 1    | 2    | 2    | 2    | 1    | 1    | 2    | 1    | 2    | 1    | 1    | 0    | 3    | 2    | 2    | 0    | 0    | 0    | 1    | 1    | 1    | 0    |
| Leprosy                  | 19   | 14   | 13   | 16   | 8    | 12   | 6    | 7    | 12   | 7    | 2    | 4    | 5    | 3    | 4    | 5    | 7    | 3    | 2    | 3    | 5    | 4    |
| Rabies                   | 0    | 0    | 0    | 0    | 0    | 0    | 0    | 2    | 0    | 0    | 0    | 0    | 0    | 0    | 0    | 0    | 0    | 0    | 0    | 0    | 0    | 1    |

Source: National Institute of Infectious Diseases. We used the following webpages: <https://www.niid.go.jp/niid/ja/ydata/10067-report-ja2019-20.html> (for chikungunya, dengue, echinococcosis, and rabies), <https://www.niid.go.jp/niid/ja/leprosy-m/1841-lrc/1707-expert.html> (for leprosy), and <https://www.niid.go.jp/niid/ja/bu-m/1842-lrc/1692-buruli.html> (for Buruli ulcer). Exceptionally, data for the year 2020 were retrieved from NIID's annual report (<https://www.niid.go.jp/niid/images/idsc/idwr/IDWR2020/idwr2020-52-53.pdf>). Since this 2020 report made no distinction between alveolar and cystic echinococcosis, we assumed that all cases were alveolar echinococcosis.

<https://doi.org/10.1371/journal.pntd.0011854.t002>

is a domestic strain to Japan or possibly to some parts of Asia [135]. Cases diagnosed in Japan from 1980 to 2010 showed no evidence of patient contact with an aquatic environment [22] and the route of transmission remains unclear in Japan, as also the case in other parts of the world. Further investigation is needed to understand the route of transmission of *M. ulcerans* in Japan.

**Public health response.** No legal framework exists to respond to Buruli ulcer. Surveillance of Buruli ulcer is led by the LRC/ NIID, while there is no mandate issued by the government for the conduct. There could be under-reporting as the reporting of the disease is not mandatory, and the reporting only happens when attending physicians are aware of the reporting system. LRC compiles data and reports to WHO.

In Japan, the diagnosis of Buruli ulcer is based on the following criteria: 1) cutaneous manifestation compatible with Buruli ulcer, such as deep ulceration, necrotic tissue, presence of undermining, 2) a histopathological examination of the skin showing necrosis with limited inflammatory cells and/or presence of acid-fast bacilli, and 3) a positive result of a polymerase chain reaction (PCR) test detecting the *M. ulcerans*-specific IS2404 gene. PCR test is available at LRC as an administrative diagnostic test, and they receive samples nationwide. Mycobacterial culture is also recommended. However, it may take months to culture *M. ulcerans* and the results are often unavailable at the time of making treatment decisions; it is sometimes useful in examining the drug susceptibility.

Among two medicines recommended by WHO, rifampicin is approved in Japan for treatment of Buruli ulcer. The other medicine, clarithromycin, is also approved by PMDA but is available only for off-label use. In addition, levofloxacin is often added to the regimen, which is also available only for off-label use.

## Chagas disease

**Epidemiology.** Chagas disease is caused by a parasite, *Trypanosoma cruzi*. In Japan, Chagas disease is mainly found among immigrants from endemic countries, such as Brazil, Bolivia, and Peru. The number of Latino immigrants living in Japan has increased after Latin Americans of Japanese origin were allowed to work and stay in Japan in 1990 [138]. Nearly 230,000 Latin Americans nowadays reside in Japan [25], and it is estimated that 3,000–4,500 people are infected with *T. cruzi* [24].

*Triatoma rubrofasciata*, a potential vector of *T. cruzi*, is distributed among the Nansei Islands in Okinawa and Kagoshima Prefectures, but the risk of *T. cruzi* transmission by this



vector species is considered low [139, 140]. The parasite can be spread via congenital transmission, blood transfusion, and organ transplantation [141–143], which are the potential transmission route for Chagas disease in Japan.

Several cases of *T. cruzi* infection have been reported among Latino immigrants living in Japan [26, 27], including two cases in which patients were treated with benznidazole [28–31], one case in which a pacemaker was implanted for Chagas cardiomyopathy [144], and two cases of death from Chagas disease [145, 146]. It is noteworthy that two cases of congenital transmission were also reported in Japan [24, 25] and both cases were treated with benznidazole [26, 31, 147, 148].

The Japanese Red Cross Society revealed that 3 out of 18,076 (0.017%) at-risk blood donors, defined as those who were born or raised in Latin America, those whose mothers were born or raised in Latin America, or those with a travel history to Latin America, were positive for *T. cruzi* antibody [149]. The first *T. cruzi*-infected blood donor was found in 2013 [138, 150]. Another *T. cruzi*-infected donor found in 2014 had previously provided blood products to 11 recipients but the transfusional transmission of *T. cruzi* has not been confirmed to date in Japan [25, 149, 151, 152]. No case of transmission by organ transplantation has been reported to date [24].

**Public health response.** There is no legal framework for responding to Chagas disease. The Japanese Red Cross Society currently runs a screening program targeting all at-risk blood donors [140]. In addition, a non-profit organization provides weekly screening at the Consulate-General of Brazil in Tokyo [25]. Laboratory testing for the diagnosis of Chagas disease is available at Saitama Medical University (<https://ccidr-saitama.com/en/clinical-research-2/>). None of the therapeutics, benznidazole nor nifurtimox, is approved by PMDA. Both therapeutics can be obtained from WHO, according to the Research Group of Tropical Diseases and Parasitic Diseases' website.

## Dengue and chikungunya

**Epidemiology.** Dengue and chikungunya are febrile diseases caused by viruses that are transmitted to humans mainly by two mosquito species: *Aedes aegypti* and *Aedes albopictus*. *A. aegypti* has not established its life cycle in Japan, but there is a risk that this mosquito species can be imported into Japan [153]. *A. albopictus* is the main vector in Japan and its habitat has spread into the northern prefectures, probably due to global warming [154].

In Japan, more than 100 dengue cases have been reported to NIID each year since 2010, with the highest number of 461 in 2019 (Table 2). As only symptomatic cases are detected and reported to NIID, the actual number of infections, including asymptomatic cases, was estimated to be 20 times higher than the number of reported cases [32]. Dengue is largely an imported disease in Japan, as shown by one fatal case in 2016 with a person who returned from the Philippines [35]. From 1945 to 2013, no domestic transmission was confirmed [36], except for a case in which a nurse was infected by a needlestick injury in 1992 [155]. In 2013, a case of possible domestic transmission was reported, in which a German traveler was diagnosed with dengue fever after she visited Japan [156, 157]. In 2014, an outbreak of dengue fever occurred in Tokyo [33]. This outbreak resulted in the confirmation of 162 cases among visitors to public parks, such as Yoyogi Park in Tokyo [34]. Serotype 1 dengue virus was detected from mosquitoes collected in Yoyogi Park as well as from patients who had visited the park [158–161]. The virus was considered to have originated from Southeast Asia or China [162].

Between 2011 and 2020, a total of 142 chikungunya cases have been reported to NIID (Table 2). To date, all reported cases were imported from outside Japan, such as Sri Lanka, Malaysia, Angola, Indonesia, the Philippines, Tonga, the Commonwealth of Dominica,

Colombia, and Cuba [37, 38]. Case reports described how chikungunya was imported to Japan, including two cases of Japanese siblings who visited the Cook Islands in 2015 [163], a case of a traveler from Angola to Japan in 2016 [164], a case of a Japanese returning traveler from India [165], a case of a Japanese woman who worked in the Commonwealth of Dominica in 2014 [166], and a case of a Japanese returning traveler from Jamaica [167]. The Narita Airport quarantine station also reported three cases among travelers from Southeast Asia in 2013 [168].

**Public health response.** Dengue and chikungunya are covered by the Infectious Disease Control Law and any confirmed cases should be immediately reported to the NIID. The Quarantine Law requires quarantine stations at ports and airports to offer medical examinations and blood tests for the detection of dengue and chikungunya to travelers who present symptoms and risks of having been bitten by mosquitoes. The Ministry of Health, Labor, and Welfare issued a guideline in 2015 for the prevention of mosquito-borne infections [169]. This guideline defines the roles of stakeholders, including the national and prefectural governments. The NIID also published a manual for local governments to conduct epidemiological surveys and mosquito control [169]. When a case of domestic dengue transmission was confirmed in Okinawa Prefecture in 2019, the prefectural government responded immediately following these guidelines and successfully prevented further transmission [170].

NIID has published laboratory procedure manuals for both diseases and laboratory tests are available at the NIID and Prefectural Institutes of Public Health [171, 172]. In addition, diagnosis of dengue is available at medical facilities listed by the Japanese Society of Travel and Health (<http://jstah.umin.jp/03posttravel/index.htm>). Dokkyo Medical University's Saitama Medical Center also offers testing for chikungunya.

## Dracunculiasis

**Epidemiology.** Dracunculiasis, or Guinea-worm disease, is caused by the parasitic worm, *Dracunculus medinensis*. In recent years, human cases have been reported only from some African countries. Our review found no evidence of dracunculiasis in Japan.

**Public health response.** No legal framework covers dracunculiasis. Laboratory services to support diagnosis of dracunculiasis are not available in Japan.

## Echinococcosis

**Epidemiology.** Human echinococcosis involves two diseases: cystic echinococcosis caused by *Echinococcus granulosus* and alveolar echinococcosis caused by *Echinococcus multilocularis*. Between 2010 and 2019, a total of 10 and 231 cases were reported to NIID for the infection of *E. granulosus* and *E. multilocularis*, respectively. The reporting rates are relatively stable over the last 20 years for both infections (Table 2).

In Japan, cystic echinococcosis is considered to be an imported disease [47–49]. The infection of *E. granulosus* was confirmed in a Japanese female who might have been infected in the United Kingdom [50] and immigrants from Afghanistan [51], China [47], Nepal [52, 53], and Peru [54]. While *E. granulosus* seems to be continuously being introduced into Japan by imported cattle [173], there is no evidence that this parasite has established a transmission cycle infecting humans within Japan.

In contrast, *E. multilocularis* infection is endemic to the northern island of Hokkaido Prefecture. Between 1924–1926, foxes infected with *E. multilocularis* were artificially introduced to Hokkaido for rodent control by mankind [174]. Since the first human case was found in 1936, the infection has spread over Hokkaido by the 1980s [175]. The majority of human cases have occurred in Hokkaido, with some exceptions found in other prefectures [39]. Several clinical cases are well documented, including Japanese adults living in Hokkaido [40–42], a

pediatric case in Hokkaido in which the patient died of liver failure [43], adult cases found in Chiba and Kanagawa Prefectures who had traveled to Hokkaido [44, 45], and a Bolivia-born female with a history of traveling to Hokkaido who was co-infected by *E. granulosus* and *E. multilocularis* [46]. In addition to foxes, the animal infection has also been reported in rats [176], horses [177, 178], pigs [39], dogs [179–181], a zoo-raised Diana monkey [182], and a flying squirrel [183]. The further spread of *E. multilocularis* from Hokkaido to other areas due to the travel of infected humans and animals is a significant concern in Japan. NIID considers that *E. multilocularis* has established its life cycle among wild dogs in some areas of Aichi Prefecture, but no human case has been yet reported [184].

**Public health response.** Echinococcosis is covered by the Infectious Diseases Control Law and any infected cases should be immediately reported to NIID. The Hokkaido local government has implemented an echinococcus control program, combining health education, screening for human echinococcosis, vector control, and improvement of clean water supply, which is considered to be key to preventing an outbreak of human infections in Hokkaido Prefecture [175]. NIID published a manual of the diagnostic procedure to detect and report echinococcus infections [185]. According to this manual, differential diagnosis is available at the NIID and the Hokkaido Institute of Public Health. For treatment, the WHO-recommended albendazole is approved by PMDA.

## Foodborne trematodiasis

**Epidemiology.** Foodborne trematodiasis are caused by intakes of fish, crabs, or vegetables contaminated by the larvae of trematode. WHO recognizes four foodborne trematodiasis: clonorchiasis, opisthorchiasis, fascioliasis, and paragonimiasis. Of these, clonorchiasis, fascioliasis, and paragonimiasis are endemic in Japan. Imported cases of opisthorchiasis have been reported in the past, but we found no literature for this review.

Clonorchiasis is caused by *Clonorchis sinensis* parasitizing the bile ducts in the liver. In Japan, *C. sinensis* used to be widely distributed all over the country except in Hokkaido Prefecture. The number of cases has fallen drastically after the 1970s as the population of the intermediate host, *Parafossarulus* snails, declined; however, the domestic transmission is not completely contained [55]. Sporadic imported cases and a few domestic cases are reported to date in Japan [56, 57].

Fascioliasis is caused by *Fasciola hepatica* and *Fasciola gigantica*. *Fasciola* spp. is primarily found in the ungulates, such as cattle, sika deer, and wild boars. The prevalence of fascioliasis in beef cattle has gradually decreased from 18.6% in 1964 to 0.06% in 2010; however, *Fasciola* spp. is still detected in cattle produced all over Japan [186]. A few cases of human fascioliasis have been reported, and there are risks of domestic transmission among small-scale cattle ranchers and their neighbors. The consumption of vegetables contaminated with metacercaria could be a source of *Fasciola* spp. infections in Japan [61]. In addition, some imported cases of human fascioliasis from Vietnam and China have been reported [62, 63].

Paragonimiasis is caused by an infection with *Paragonimus* spp. in the human lungs. *P. westermani* and *P. miyazakii* are widely distributed in all regions of Japan except in Hokkaido Prefecture [187]. About 50 cases of paragonimiasis continue to be reported annually [188]. *Paragonimus* spp. is transmitted by the consumption of inadequately cooked freshwater crabs [187, 189] or meat of wild boar and sika deer [190–193]. Some basins in Chiba Prefecture are identified with a high risk of domestic transmission as more than 90% of freshwater crabs were found with *P. westermani* [194]. In contrast to the decreasing number of cases among Japanese nationals, the number of cases among migrants living in Japan is increasing [58–60].

**Public health response.** Under the Food Sanitation Act, foodborne trematodiasis are reportable to health centers as food poisoning events, but the food poisoning statistics do not count them as separate diseases. Confirmatory diagnosis is made by morphological identification of eggs but in Japan, diagnosis is based on a combination of imaging with X-rays and MRI, parasite-specific antibody tests, and molecular confirmation. Serological tests of foodborne trematodiasis are available at Miyazaki University and Aichi Medical University. The Department of Parasitology of NIID offers both serological and molecular tests. Praziquantel is approved by PMDA for treatment of clonorchiasis and paragonimiasis. It can also be used for treatment of opisthorchiasis as an off-label drug. Triclabendazole is recommended by WHO for treatment of fascioliasis and paragonimiasis but is not approved by PMDA. Triclabendazole is stored by the Research Group of Tropical Diseases and Parasitic Diseases for clinical trials.

### Human african trypanosomiasis

**Epidemiology.** Human African trypanosomiasis, or sleeping sickness, is caused by the parasite *Trypanosoma brucei*. Transmitted by tsetse flies, this disease is endemic in sub-Saharan African countries. Our review found no evidence of human African trypanosomiasis in Japan. Even if people infected with *T. brucei* come to Japan from the endemic regions, the risk of transmission is considered low because no tsetse flies have been found in the country [195].

**Public health response.** No legal framework is available for human African trypanosomiasis. The Japanese Red Cross Society does not take blood donations from those who have lived in Africa and have a history of the disease. No institution offers diagnostic testing. Among six WHO-recommended drugs, namely, pentamidine, suramin, melarsoprol, eflornithine, nifurtimox, and fexinidazole, only pentamidine is approved by PMDA for off-label use. Suramin, melarsoprol, and eflornithine can be obtained from WHO, according to the Research Group of Tropical Diseases and Parasitic Diseases.

### Leishmaniasis

**Epidemiology.** Leishmaniasis is caused by infection with *Leishmania* parasites, which are transmitted by sandfly species. In Japan, a small number of imported cases of cutaneous and mucocutaneous leishmaniasis have been documented. These cases have been found in three groups, including Japanese nationals who came back from overseas, such as Venezuela [64], Burkina Faso [65], and Brazil [66]; Japanese descendants who had lived overseas, such as in Bolivia [67] and Brazil [68]; and non-Japanese nationals who came to Japan, such as a student from Sri Lanka [69], a child from Syria [64], and an adult from Ethiopia [70]. In 2006 and 2007, two cases of canine leishmaniasis were found in dogs that used to live in Italy [196]. One of the vector species, *Phlebotomus squamirostris*, has been found in Japan [197]. Despite the continuous importation of the parasites and the presence of vectors within the country, there is no evidence of domestic transmission of *Leishmania* parasites to humans.

**Public health response.** No legal framework responds to leishmaniasis. Diagnosis and treatment of leishmaniasis have occurred occasionally, only when experienced physicians could suspect the infection, particularly seeing immigrants or returnees with skin lesions. Aichi Medical University Hospital offers parasitological tests for leishmaniasis. Among five medicines listed by the WHO, namely, amphotericin B, meglumine antimoniate, miltefosine, paromomycin, and sodium stibogluconate, only amphotericin B is approved by PMDA for treatment of leishmaniasis. Paromomycin sulfate is also approved by PMDA but is available for off-label use only. Miltefosine and sodium stibogluconate can be privately imported [21].

## Leprosy

**Epidemiology.** Leprosy, caused by *Mycobacterium leprae*, is nearly eliminated in Japan. Since 2008, the annual number of newly diagnosed cases has stayed below 10 (Table 2). While we found no evidence of recent domestic transmission, cases of leprosy continue to be reported. LRC reported seven new cases among Japanese nationals from 2010 to 2020 [71]. More than half of the new Japanese cases are reported from Okinawa Prefecture [198], where a few relapsed cases are also found every year [199]. Case reports describe conjugal infection among a couple [200], relapsed leprosy developing drug resistance [201], and leprosy neuropathy [202]. Sequelae of leprosy are also documented, such as skin cancers formed at chronic ulcers [203, 204], intractable ulcers complicated by diabetes and the sequelae of leprosy [205], visual dysfunction [206, 207], and dysmimesis and dysphagia due to facial paralysis [208].

Alongside the domestic cases, there are also imported cases from endemic countries [72]. LRC reported a total of 38 new cases of foreign nationals from 2010 to 2020, which is 84% of the total number of new cases reported during the same period [71]. For example, three foreign nationals, including a Filipino, a Paraguayan, and a United States soldier born in Micronesia, were found with leprosy in Japan [73–75]. A Brazilian who had been treated for leprosy in Brazil 16 years ago was diagnosed with relapsed leprosy in Japan [209].

**Public health response.** Leprosy control in Japan has a history of over 100 years. The Leprosy Prevention Law was first established in 1907, then revised twice, and repealed in 1996 [210, 211]. The main approach of this law was to isolate patients in national leprosy sanatoria to break the chain of transmission, while the current scientific evidence tells us that this was not necessary, especially after the introduction of antibiotic treatment in the early 1950s. Between 1909 and 2010, a cumulative total of 56,575 patients were admitted to the 13 national sanatoria [212]. Although the law became a dead letter around 1970 [210], 1,718 persons still live in sanatoria as of 2016 [213]. The long-lasting isolation policy severely affected patients' dignity and *raison d'être* as human beings [214]. Even after their reintegration into society, ex-patients often face stigma and discrimination, and therefore many preferred to remain in sanatoria [215–217]. The patient associations continue to fight for the recovery of deprived human rights [213].

Currently, there is no legal framework for leprosy control, in terms of newly diagnosed cases. There are two existing laws aiming to restore the honor of those affected by the isolation policy and discrimination. LRC functions as a referral center for newly diagnosed cases and compiles data and reports to WHO. The LRC also provides administrative laboratory testing for the diagnosis of leprosy. Three WHO-recommended medicines, namely, rifampicin, dapsone, and clofazimine (multi-drug therapy; MDT), are approved by PMDA. The Japanese Leprosy Association publishes guidelines for diagnosis and treatment [218, 219]. Abolishment of the Leprosy Prevention Law in 1996 allowed any dermatologist to provide medical care to leprosy patients [220]; however, diagnosis of leprosy-related conditions tends to delay because of the lack of knowledge about leprosy among healthcare providers [72], no follow-up system for ex-patients, or patients' hesitation to consult local physicians [204]. Current challenges include providing care to the small number of new, relapsed, or imported cases, as well as, addressing sequelae or complications among ex-patients [221].

## Lymphatic filariasis

**Epidemiology.** Lymphatic filariasis is a mosquito-borne disease caused by *Wuchereria bancrofti*, *Brugia malayi*, and *Brugia timori*. This disease was endemic in the Kyushu Region, Okinawa Archipelago, and Ogasawara Islands of Tokyo but was eliminated in the 1970s by large-scale community screening, awareness campaigns, chemotherapy of the infected people

with diethylcarbamazine (DEC), and vector control [222]. This set of interventions was a new strategy at the time, which is now adapted by endemic countries worldwide. In recent years, we only experience, on a yearly average, one or two imported cases among migrants or travelers [76, 77].

**Public health response.** No legal framework responds to lymphatic filariasis. Serological and molecular testing is available at Aichi Medical University. One of the three WHO-recommended medicines, DEC, is approved by PMDA for treatment of lymphatic filariasis. The other two WHO-recommended medicines; ivermectin and albendazole, are approved by PMDA but are available for off-label use only.

### Mycetoma, chromoblastomycosis and other deep mycoses

In line with the WHO's NTD road map [1], this section addresses four diseases: mycetoma, chromoblastomycosis, sporotrichosis, and paracoccidioidomycosis.

**Epidemiology.** Mycetoma is a chronic, granulomatous infectious disease and can be etiologically classified into two subgroups: eumycetoma caused by fungus and actinomycetoma caused by bacteria. About 20 pathogens are known to cause mycetoma [223]. Our review identified two cases of mycetoma which were caused by bacteria belonging to the *Nocardia* genera [78, 79]. *Nocardia brasiliensis* is the most common causative agent of cutaneous nocardiosis [79]. In Japan, mycetoma cases tend to be reported as bacterial or fungal infections rather than defining them as mycetoma because diagnosis of mycetoma largely relies on the identification of causative pathogens by molecular methods. Indeed, among 88 cases of *N. brasiliensis* infection found from 1995 to 2013, only 16 cases (18%) were reported as mycetoma [79]. This reporting practice seems to obscure the epidemiological understanding of mycetoma in Japan. Imported cases have not been reported for the study period.

Chromoblastomycosis is a fungal infectious disease often triggered by trauma. In Japan, *Fonsecaea monophora* is considered to be the most common causative agent [224]. Our review found case reports of *F. monophora* infection [80–82] as well as *F. nubica* infection [83]. While chromoblastomycosis is largely transmitted within Japan, an imported case from the Philippines was also found in 2008 [81]. Recently, 10 to 20 cases of chromoblastomycosis or phaeohyphomycosis have been reported every year [224].

Sporotrichosis is known to be associated with farming and gardening since its causative fungus can be found in soil or plants. Causative pathogens are morphologically similar fungi, including *Sporothrix schenckii*, *S. globosa*, and other *S. spp.* In Japan, a molecular study revealed that most of the clinical strains (291/300) previously identified as *S. schenckii* were actually *S. globosa* [225]. The guideline for treatment of fungus infections, published by the Japanese Dermatological Association, describes *S. globosa* as the main causative agent of sporotrichosis [224]. Our literature search identified 16 domestically transmitted cases [84–86]. Geographically, most of the cases were found in the river basins of the Kanto and Kyushu Regions [87]. This disease is commonly observed on the upper extremities in adults and on the face in children, although the number of pediatric cases is decreasing [224]. The number of newly diagnosed cases peaked in the 1980s and has gradually declined due to urbanization and a decrease in the number of farmers [226], with an average of approximately 10 cases per year since 2010 [224].

Paracoccidioidomycosis is caused by *Paracoccidioides brasiliensis*. The number of paracoccidioidomycosis cases increased rapidly in the 1990s, mainly among Brazilians coming to Japan, but has decreased since 2000 [227]. Between 1961 and 2015, 21 cases were reported and this disease is recognized as one of the imported fungal infections in Japan [88].

**Public health response.** No legal framework responds to mycetoma, chromoblastomycosis, sporotrichosis, and paracoccidioidomycosis. At the moment of this writing, IDMA provides a list of 17 laboratories. Among them, the Medical Mycology Research Center at Chiba University is known as a specialized diagnostic facility (<http://www.pf.chiba-u.ac.jp/>). Treatment of mycetoma depends on the causative pathogens. WHO does not specify any drug but itraconazole, which is described as treatment of eumycetoma in the WHO's NTD road map [1]. Itraconazole is also included in the WHO Model Lists of Essential Medicines for treatment of chromoblastomycosis, sporotrichosis, and paracoccidioidomycosis. In Japan, itraconazole is approved by PMDA for treatment of chromoblastomycosis and sporotrichosis. In addition, amphotericin B and potassium iodide are recommended by the WHO Model Lists for treatment of sporotrichosis. Both medicines are approved by PMDA while amphotericin B is available for off-label use only. The Japanese Dermatological Association has a guideline for treatment of fungal infections published in 2019 [224].

### Onchocerciasis

**Epidemiology.** Onchocerciasis, also commonly known as river blindness, is caused by a parasite called *Onchocerca volvulus*. *O. volvulus* is transmitted by repeated bites from black flies (*Simulium* spp.). In Japan, no cases of onchocerciasis caused by *O. volvulus*, including imported cases, have been reported to date. In contrast, several human cases of zoonotic onchocerciasis, caused by *Onchocerca dewittei japonica*, have been reported in the last 20 years [228–232]. The terminal hosts of *O. dewittei japonica* are domestic animals, such as cattle and horses, as well as wild animals, such as wild boar and Japanese deer.

**Public health response.** No legal framework responds to onchocerciasis. No hospitals and laboratories offer diagnostic testing. Ivermectin, a medicine recommended by WHO for treatment of onchocerciasis, is approved by PMDA but for off-label use only.

### Rabies

**Epidemiology.** In Japan, there were large epidemics of rabies before the 1940s [89]. Rabies was successfully eliminated by 1957 and, as Table 2 shows, only a few cases have been reported in recent years: one imported case in 1970 and two cases in 2006 with travel histories abroad [233]. In 2020, one Filipino worker developed rabies in Japan, who was previously bitten by a dog back in the Philippines [234].

One study showed that the incidence of animal bites among Japanese expatriates and travelers in Thailand was 1.7 and 43.1 per 1,000 person-months, respectively [235]. Certain numbers of Japanese travelers are treated in Japan for possible rabies exposure abroad [236, 237]. The majority of exposures occurred in Asia due to dog or cat bites. One study showed that only 13.0% - 16.7% of travelers bitten by animals abroad received rabies immunoglobulin (RIG) before they returned to Japan [238].

**Public health response.** Three laws, the Rabies Prevention Law, the Domestic Animal Infectious Diseases Control Law, and the Infectious Diseases Control Law, frame prevention and control of human and animal rabies, such as registration and vaccination of domestic dogs, required quarantine of susceptible imported animals, and planning of science-based national actions. Notification of human rabies is mandatory. The government published a guideline for rabies control in 2001 and revised it in 2013 [239]. More about government rabies control is described elsewhere [240]. Laboratory diagnostic tests for rabies confirmation are available at NIID, Oita University, and Kagoshima University. RIG is not available in Japan. Two human rabies vaccines are approved by PMDA, namely, Rabipur (GSK) and Inactivated Tissue Culture Rabies Vaccine (KM Biologics CO., Ltd.).

There have been ongoing discussions about the mandatory annual vaccination of domestic dogs. The current vaccination schedule can provide dogs with protective antibody levels [241]. Although the official data report coverage of over 70%, the true coverage could be lower because of unregistered and unvaccinated dogs. While a web-based survey suggested a high prevalence of immunity among domestic dogs [242], two small-scale studies suggested low protection levels in impounded dogs [243] and juvenile dogs [244]. Furthermore, some researchers argue for the discontinuation of the mandatory vaccination of domestic dogs based on several pieces of evidence. The risk of the re-introduction of a rabid dog to Japan is remarkably low [245, 246]. Even when a rabid dog enters Japan, it is unlikely to cause large outbreaks [247], partly because the probability for a dog to have contact with other dogs is low in Japan [248]. In that situation, the implementation of mandatory vaccination was shown to be economically inefficient [249, 250].

## Scabies

**Epidemiology.** Scabies is a skin infestation caused by a scabies mite or *Sarcoptes scabiei* var. *hominis*. In Japan, scabies outbreaks have been regularly reported. Most outbreaks occur in hospitals, nurseries, and care homes [91–98]. There is no nationwide epidemiological data, but a report estimated the annual number of cases to be between 80,000 and 150,000 [90].

**Public health response.** No legal framework responds to scabies. No mandatory reporting system has been established but hospitals and facilities are encouraged to report outbreaks to local health authorities. The Japanese Dermatological Association published the latest guideline for the diagnosis and treatment of scabies in 2015 [251]. The accuracy of diagnosis depends on dermatologists' ability to identify *S. scabiei* using dermoscopy or microscopy. Among WHO-recommended medicines, only ivermectin is approved by PMDA for treatment of scabies. Benzyl benzoate and permethrin are not approved by PMDA. Benzyl benzoate has been used for a long time for treatment of scabies in Japan, although this unapproved medicine is not listed as the first-line topical treatment [251]. Besides, phenothrin lotion and topical sulfur preparation are approved by PMDA in Japan.

## Schistosomiasis

**Epidemiology.** *Schistosoma japonicum*, one of the causative agents of schistosomiasis, was once endemic to Japan but its transmission to humans has been considered to be interrupted since 1996 [252]. In recent years, some obsolete cases have been reported with egg embolism and old granuloma, as a consequence of past infections [253–255]. Imported cases of schistosomiasis have been reported mainly among Asian immigrants and Japanese travelers infected in endemic countries, such as China [99], the Philippines [100–104], and some African countries [105–107]. Schistosomes are continuously brought to Japan; however, the risk of domestic schistosome transmission is considerably low because the vector snail of *S. japonicum*, *Oncomelania hupensis nosophora*, is distributed only in Kofu Basin and Obitsu River Basin [252, 256–258] and vectors of other schistosomes have not been found in Japan.

**Public health response.** No legal framework responds to schistosomiasis. Serological testing for diagnosis of *S. japonicum* is available at Miyazaki University upon request from physicians (<http://www.med.miyazaki-u.ac.jp/parasitology/detail.htm>). The WHO-recommended first-line drug, praziquantel, is approved by PMDA, but it is available for off-label use only.

## Snakebites

**Epidemiology.** Among approximately 20 venomous snakes inhabiting Japan [259, 260], *Gloydius blomhoffii* (or mamushi) is the most epidemiologically important viper. Annually,



1,000–3,000 cases of mamushi bites are reported, including approximately 10 fatal cases [108–110]. The mortality rate of mamushi bites is estimated to be 0.07–0.20% [110, 261]. *Rhabdophis tigrinus* (or yamakagashi) is also widely distributed in Japan. While less than one case of yamakagashi bites is annually recorded on average, the in-hospital mortality rate can be 10–11% [262, 263]. *Gloydius tsushimaensis* only inhabits Tsushima Island in Nagasaki Prefecture, where 72 cases of snake bites by this species were reported between 2005 and 2018, including one death [264]. In the Nansei Islands in Okinawa and Kagoshima Prefectures, five species belonging to the *Protobothrops* genus (or habu) are responsible for snake bites. Okinawa Prefecture alone recorded around 100 cases of habu bites annually between 2012 and 2014, but no fatal case was reported [265–267]. A rare case of snake bite by an illegally-kept eastern green mamba (*Dendroaspis angusticeps*) was also reported [268].

Case reports describe various clinical conditions caused by mamushi bites, including death [111], acute renal failure [112–114], cerebral infarction [115], osteomyelitis [116], thrombocytopenia [117], compartment syndrome [118], diplosia [119], and limited range of motion in hand fingers [120]. Some pediatric cases of mamushi bites are also reported [121–125]. Other case reports describe yamakagashi bites causing disseminated intravascular coagulation [126] and habu bites inducing acute compartment syndrome [127]. Snakebites are a serious public health concern in Japan.

**Public health response.** No legal framework responds to snakebites. There is no national surveillance system, except for Okinawa and Kagoshima Prefectures reporting the number of habu bites. In Japan, no diagnostic kits are available for clinicians to confirm snake-venom poisoning, requiring clinicians to make a clinical diagnosis including the identification of snake species [269]. Japan Snake Center (<https://www.snake-center.com/diagnosis>) offers consultations to health care providers. For treatment, no snake antivenom is specified by WHO. Freeze-dried antivenoms for mamushi and habu bites are approved by PMDA. Yamakagashi antivenom is available only for clinicians participating in a clinical study [270]. Many local governments publish lists of hospitals that store mamushi antivenom. Despite the availability of antivenoms, whether and when to administer antivenoms has not been standardized in Japan [271]. After a review article concluded that antivenom is the definitive therapy for severe cases [269], some agree that antivenoms should be administered to severe cases [117] or as early as possible [272], but others argue that it is difficult to establish a consistent treatment approach [273]. In addition, several case reports suggest that traditional herbal medicines were effective in some local lesions [274–277]. There is no consensus among physicians about treatment of snakebites in Japan.

## Soil-transmitted helminthiases

**Epidemiology.** Soil-transmitted helminthiases are a group of chronic intestinal diseases caused by several species of helminths. This group includes ascariasis, ancylostomiasis, necatoriasis, trichuriasis, and strongyloidiasis. The annual cases of soil-transmitted helminthiases have decreased in the last decades, except for strongyloidiasis, which has been constantly found in Japan [129, 278].

Strongyloidiasis is mainly caused by *Strongyloides stercoralis*, which is transmitted from the contaminated soil to humans through the skin. Distinctive characteristics of this parasite are autoinfection that can persist and replicate within a host for decades. It potentially leads to life-threatening events such as hyperinfection syndrome and disseminated strongyloidiasis, particularly in immunocompromised patients. In Japan, strongyloidiasis cases are reported nationwide but are more likely to be found in people over 50 years of age, especially in subtropical areas of Okinawa and Kagoshima Prefectures [129]. The prevalence in endemic areas

is estimated to reach 18.7% [130]. At least 15 strongyloidiasis cases were estimated to be diagnosed per year in Japan [129].

Strongyloidiasis has been reported particularly among patients with other diseases and conditions, including adult human T-cell lymphotropic virus type 1 infection, meningitis, solid organ malignancy, rheumatic diseases, type 2 diabetes mellitus, steroid use, and organ or bone marrow transplant [279–285]. These cases suggest that the use of immunosuppressive drugs in asymptomatic carriers of *S. stercoralis* may be associated with hyperinfection syndrome and disseminated strongyloidiasis. An imported case from Cambodia is documented in which the patient was co-infected with strongyloidiasis and extrapulmonary tuberculosis [131].

Ascariasis, ancylostomiasis, necatoriasis, and trichuriasis, were endemic to Japan but the transmission of these helminths to human beings was considered to be almost eliminated by 1975 [286]. Nowadays, infections with these helminths are sporadically reported, including presumably imported cases [128] and a case of multiple infections with *Ascaris lumbricoides*, *Trichuris trichiura*, and *Necator americanus* in an 84-year-old woman [132]. A clinical testing facility continues to detect a few ascariasis cases between 2000 and 2018 [133], but it is unknown whether these cases indicate recent *Ascaris* transmission. In the late 2010s, a school-based study detected no infection in five prefectures, suggesting that transmission has become rare even in the areas where high prevalence was previously reported [278], but it is not clear whether transmission of *A. lumbricoides*, *Ancylostoma duodenale*, *N. americanus*, and *T. trichiura* is eliminated in Japan.

**Public health response.** No legal framework responds to soil-transmitted helminthiasis. The Tokyo Health Service Association (<https://www.yobouigaku-tokyo.or.jp/>) has offered parasite screening tests to long-term overseas residents upon their return to Japan since 1987 [287]. Fecal examinations for the diagnosis of *A. lumbricoides*, *T. trichiura*, *A. duodenale*, and *N. americanus* infections are widely accessible at local hospitals and clinics, particularly through commercial laboratories. As for WHO-recommended medicines, pyrantel is approved by PMDA for treatment of ascariasis, ancylostomiasis, and necatoriasis. Mebendazole and ivermectin are also approved for treatment of trichuriasis and strongyloidiasis, respectively. Albendazole is approved but available for off-label use only. Levamisole is not approved in Japan.

## Taeniasis and cysticercosis

**Epidemiology.** Taeniasis is an intestinal infection caused by three species of zoonotic cestode: *Taenia solium*, *Taenia saginata*, and *Taenia asiatica*. Only *T. solium* causes serious conditions known as neurocysticercosis. This review focused on cysticercosis caused by *T. solium*. *T. solium* is not considered to be transmitted to humans in Japan because most of the cysticercosis cases are imported or related to travel histories to endemic areas including Nepal, India, and Cambodia [288–293]. However, a literature review [294] identified 39 cysticercosis cases that were found between 1994 and 2010, including seven Japanese nationals without overseas travel histories. This evidence suggests that *T. solium* domestic transmission cannot be ruled out. The possibility of *T. solium* domestic transmission is further supported by the outbreak of human taeniasis due to *T. asiatica* in Tokyo in 2010, as *T. solium* and *T. asiatica* share the same transmission pathways, such as raw pork meat consumption [295].

**Public health response.** *T. solium* infection is reportable as food poisoning under the Food Sanitation Act. Cysticercosis is not covered by the Infectious Diseases Control Law. In Japan, all domestic animals, such as pigs and cows going into the food chain are mandatorily inspected before harvesting (carcass inspection) under the Slaughterhouse Act and the Act on Domestic Animal Infectious Diseases Control. Molecular confirmation of histopathologic

specimens is highly useful for the diagnosis of cysticercosis and is available in NIID. Neurocysticercosis is usually suspected due to neurological symptoms, abnormal findings in brain imaging, and the travel history to endemic areas. Serological tests are available at Miyazaki University. The WHO-recommended two anthelmintics, namely, albendazole and praziquantel, are approved by PMDA but available for off-label use only. Niclosamide is not available in Japan.

## Trachoma

**Epidemiology.** Trachoma is a disease of the eye caused by infection with the bacteria, *Chlamydia trachomatis*. No case report was found in our review. Trachoma was frequently reported in the 1950s and 1960s and, to our best knowledge, the last case was reported in 1984 [296]. Meanwhile, other forms of infection with *C. trachomatis*, such as chlamydial conjunctivitis, chlamydial infection of the genital tract, and chlamydia pneumonia are commonly reported in Japan. For instance, a sentinel survey reported 144–887 cases of genital infections by *C. trachomatis* between 2010 and 2018 [297].

**Public health response.** No legal framework responds to trachoma. Laboratory tests for diagnosing infection with *C. trachomatis*, such as PCR or antigen tests, are widely available in Japan. The WHO-recommended antibiotics, azithromycin, and tetracycline are approved by PMDA.

## Yaws

**Epidemiology.** Yaws is a chronic bacterial disease caused by infection with *Treponema pallidum* subsp. *pertenue*. Our review found no evidence of yaws in Japan.

**Public health response.** No legal framework responds to yaws. No hospitals and laboratories offer to test for yaws. However, serological testing of yaws can be substituted by testing for syphilis, and this is widely available in Japan. Azithromycin and benzathine penicillin are recommended by WHO for treatment and are approved by PMDA but available for off-label use only.

## Discussion

To our knowledge, this is the first study that summarized the current epidemiology of and public health responses to the 20 NTDs in Japan. In recent years, NTDs are barely regarded as contemporary public health problems in Japan because we experience only a limited number of cases and/or in limited settings as shown in this study. For several NTDs, such as lymphatic filariasis, rabies, schistosomiasis, leprosy, trachoma, and some soil-transmitted helminthiasis, this has been largely a result of our successful disease control programs during the 20th century [240, 298–303]. In addition, Japan has undergone substantial economic development and social changes during this time, which in part, may have contributed to controlling NTDs within the country. However, our review showed evidence that we still have cases of NTDs and the burden from this set of diseases in Japan. For instance, alveolar echinococcosis, Chagas disease, chromoblastomycosis, dengue, foodborne trematodiasis (excluding opisthorchiasis), scabies, and strongyloidiasis have been transmitted within Japan as well as imported from other countries recently (Table 1).

In the context of global health, high-income countries such as Japan are expected to play the role of donor countries to combat NTDs in low- and middle-income countries [304, 305]. Japan and other high-income countries should recognize the need to address NTDs within their own countries in addition to their global roles. With globalization and the rapid movement of people, cases of NTDs can be seen anywhere, and thus, it is indeed becoming more and more of a global problem than ever before. NTD patients in high-income countries,

whether a locally acquired or an imported case, should not be left behind in the global efforts to end NTDs.

Hotez pointed out that NTDs affect the poor living in wealthy countries [5]. While we did not find any study analyzing the distribution of NTD burdens by income levels in Japan, we found that some diseases mainly affect immigrants, who tend to live with economic vulnerabilities. For example, Chagas disease almost exclusively affects Latino communities in Japan. Similarly, cystic echinococcosis, cysticercosis, leishmaniasis, leprosy, lymphatic filariasis, and schistosomiasis are largely observed among immigrants. These findings provide the critical implication that Japan should pay additional attention to imported NTDs. As we embrace globalization in Japan, we are seeing a growing number of foreign residents in the country. Just in the past decade, it increased from 2.0 million to 2.7 million between 2012 and 2021 [306]. Addressing the health needs of immigrants is important to build an equitable health system since immigrants in Japan tend to experience barriers to health care and poorer health outcomes [307, 308].

Not surprisingly, we found a paucity of epidemiological data, even for the NTDs that are domestically transmitted in Japan, such as foodborne trematodiasis and mycetoma (Table 1). With the currently available data, it is not possible to understand the accurate burden of NTDs. The government reported that the average number of NTD patients in Japan was 340 per year through the Japan SDG Action Platform [11]. However, our study showed that this number seems to be grossly underestimated. There were at least 80,000 people who required treatment for scabies alone each year [90]. More population-level surveillance data along with clinical case reports are needed to better understand the epidemiology of NTDs in Japan. Furthermore, surveillance of NTDs in a high-income country like Japan may help improve the understanding of the situation of NTDs in other countries. For example, while laboratory testing for anti-microbial resistance is unavailable in many leprosy endemic countries, a recent epidemiological study in Japan could report cases of anti-microbial resistant strains of *M. leprae* coming from the Philippines [303]. Likewise, a case of Buruli ulcer with the same strain as that of Japan (*M. ulcerans* subsp. *shinshuense*) was reported from the Netherlands in an immigrant from China [309]. *M. ulcerans* subsp. *shinshuense* is currently known as a strain domestic to Japan, but this case report presented the possibility that it may be a strain affecting more countries in Asia. These examples underpin the importance and the need for more global surveillance of NTDs, involving high-income countries.

The levels of public health response to NTDs highly varied by disease in Japan (Table 1). For surveillance, mandatory reporting is established only for echinococcosis, rabies, dengue, and chikungunya under the Act on the Prevention of Infectious Diseases. Two prefectures have set regulations to count snakebites by habu. There is no law or regulation for the other NTDs to be reported to government agencies. For control programs by government bodies, national schemes exist for rabies, dengue, and chikungunya. Echinococcosis is controlled by the Hokkaido Prefectural Government. For diagnosis, we could identify at least one laboratory that offers confirmatory testing for all NTDs except for dracunculiasis, human African trypanosomiasis, onchocerciasis, and yaws. Despite the availability of laboratories, physicians' capacities to suspect NTDs and send samples to laboratories would require strengthening. In terms of the availability of medicines, none of the WHO-recommended medicines is approved in Japan for Chagas disease and fascioliasis. For other diseases, at least one of the WHO-recommended medicines is approved; however, drugs for cysticercosis, opisthorchiasis, human African trypanosomiasis, onchocerciasis, schistosomiasis, and yaws are available only for off-label use and patients can be required to pay all costs of treatment and related services.

Based on the findings from this review, we developed some recommendations on a way forward to advance the research and control agenda for each NTD (Table 3). A group discussion

**Table 3. Authors' recommendations to advance research or control agenda for NTDs in Japan.**

| NTD                                                   | Recommendations                                                                                                                                                                                                                                                                                                                                                                                                                                                                                                                                                                                   |
|-------------------------------------------------------|---------------------------------------------------------------------------------------------------------------------------------------------------------------------------------------------------------------------------------------------------------------------------------------------------------------------------------------------------------------------------------------------------------------------------------------------------------------------------------------------------------------------------------------------------------------------------------------------------|
| Buruli ulcer                                          | <ul style="list-style-type: none"> <li>◆ Educate dermatologists and other physicians from relevant fields to promote early diagnosis and treatment. Diagnosis of Buruli ulcer is available in Japan but requires physicians' ability to suspect the disease from the skin conditions.</li> <li>◆ Expand a physician-researcher network to improve reporting of Buruli ulcer. The current reporting system is managed by the Leprosy Research Center of the NIID and the expert group but is based on voluntary reporting from physicians leading to under-reporting.</li> </ul>                   |
| Chagas disease                                        | <ul style="list-style-type: none"> <li>◆ Investigate access to diagnosis and treatment in Japan. Two unapproved drugs, benznidazole and nifurtimox, can be obtainable from WHO, but whether patients have access to them is not clearly understood.</li> <li>◆ Establish screening programs to detect infected persons before they develop symptoms. For instance, serological testing can be integrated into workplace medical checkups or prenatal checkups in municipalities with large Latino populations.</li> </ul>                                                                         |
| Cysticercosis                                         | <ul style="list-style-type: none"> <li>◆ Educate physicians to suspect cysticercosis when immigrants from endemic areas present central nervous system infections. Domestic transmission can be triggered by infected international travelers or agricultural workers.</li> <li>◆ Maintain the mandatory inspection of meat.</li> </ul>                                                                                                                                                                                                                                                           |
| Dengue and chikungunya                                | <ul style="list-style-type: none"> <li>◆ Monitor outbreaks of dengue and a new case of domestic transmission of chikungunya.</li> <li>◆ Pay attention to the trend of imported cases from overseas and continue to monitor mosquitoes in Japan to prevent new outbreaks.</li> </ul>                                                                                                                                                                                                                                                                                                               |
| Echinococcosis                                        | <ul style="list-style-type: none"> <li>◆ Investigate why transmission of <i>E. multilocularis</i> to humans is evidenced only in Hokkaido. The risk of its spread into the main islands was investigated in 2003 [310] but needs to be updated.</li> </ul>                                                                                                                                                                                                                                                                                                                                        |
| Foodborne trematodiasis                               | <ul style="list-style-type: none"> <li>◆ Establish a monitoring system to detect hot spots of clonorchiasis, fascioliasis, and paragonimiasis, for instance, by regular stool tests for school children in areas known to be endemic in the past. Since the transmission patterns of these diseases have varied due to increased immigration, changes in dietary habits, and heavy rains/flooding, it is necessary to monitor possible epidemic areas to understand the risks.</li> </ul>                                                                                                         |
| Leishmaniasis                                         | <ul style="list-style-type: none"> <li>◆ Educate physicians to address sporadically imported cases.</li> <li>◆ Consider adopting topical paromomycin for treatment of cutaneous leishmaniasis [311] to expand treatment options.</li> </ul>                                                                                                                                                                                                                                                                                                                                                       |
| Leprosy                                               | <ul style="list-style-type: none"> <li>◆ Educate and organize dermatologists to manage leprosy patients. The repeal of the Leprosy Prevention Law in 1996 allowed patients to be managed at general hospitals or clinics, but dermatologists in general are not experienced in managing leprosy patients.</li> <li>◆ Surveillance of leprosy is continued at the LRC/NIID and the expert group, without any legal basis. The LRC can consider establishing integrated surveillance of skin NTDs that exist in Japan, to ensure the sustainability of the leprosy surveillance program.</li> </ul> |
| Lymphatic filariasis                                  | <ul style="list-style-type: none"> <li>◆ Investigate whether patients found in Japan have access to treatment.</li> </ul>                                                                                                                                                                                                                                                                                                                                                                                                                                                                         |
| Mycetoma, chromoblastomycosis, and other deep mycoses | <ul style="list-style-type: none"> <li>◆ Educate dermatologists to promote timely diagnosis.</li> <li>◆ Build a consensus among clinical researchers to report mycetoma, chromoblastomycosis, sporotrichosis, and paracoccidioidomycosis following international definitions of these diseases.</li> </ul>                                                                                                                                                                                                                                                                                        |
| Rabies                                                | <ul style="list-style-type: none"> <li>◆ Consider revising the mandatory annual vaccination of domestic dogs, as this strategy is suggested to be no more cost beneficial. The risk of having rabies introduced to and spread in Japan is considerably low.</li> <li>◆ Secure access to rabies immune globulins (RIG). Since RIG is not approved in Japan, it should probably be provided through a research group.</li> </ul>                                                                                                                                                                    |

(Continued)

Table 3. (Continued)

| NTD                            | Recommendations                                                                                                                                                                                                                                                                                                                                                                                                                                                                                                                                                                                                                                                                                                                                                                                                                                                                                                                                                              |
|--------------------------------|------------------------------------------------------------------------------------------------------------------------------------------------------------------------------------------------------------------------------------------------------------------------------------------------------------------------------------------------------------------------------------------------------------------------------------------------------------------------------------------------------------------------------------------------------------------------------------------------------------------------------------------------------------------------------------------------------------------------------------------------------------------------------------------------------------------------------------------------------------------------------------------------------------------------------------------------------------------------------|
| Scabies                        | <ul style="list-style-type: none"> <li>◆ Establish outbreak surveillance and control systems, since outbreaks of scabies have been regularly observed in Japan.</li> <li>◆ Evaluate the efficacy and safety of crotamiton and benzyl benzoate for treatment of scabies and consider obtaining PMDA approval.</li> </ul>                                                                                                                                                                                                                                                                                                                                                                                                                                                                                                                                                                                                                                                      |
| Schistosomiasis                | <ul style="list-style-type: none"> <li>◆ Raise awareness and educate physicians to promote diagnosis of schistosomiasis, since obsolete cases and imported cases have been regularly found in Japan.</li> <li>◆ Consider obtaining PMDA approval of praziquantel for treatment of schistosomiasis, as this drug is only available for off-label use.</li> </ul>                                                                                                                                                                                                                                                                                                                                                                                                                                                                                                                                                                                                              |
| Snakebites                     | <ul style="list-style-type: none"> <li>◆ Accumulate clinical cases to get the currently proposed treatment guideline updated and accepted by the medical community. Although mamushi and habu antivenoms are approved by PMDA, there is no consensus in the medical community on whether and when to administer antivenoms.</li> <li>◆ Guarantee government support for the production of yamakagashi antivenom. Yamakagashi antivenoms are voluntarily produced by a research group at the Japan Snake Center.</li> <li>◆ Establish information systems at all prefectural governments to collect and publish the number of mamushi bites, just as Okinawa and Kagoshima Prefectures do for habu bites. Although mamushi bites are frequently reported from all over Japan, there is no national surveillance system.</li> <li>◆ Collect data about the use of mamushi antivenoms to understand the demand for sustainable production and storage of antivenoms.</li> </ul> |
| Soil-transmitted helminthiasis | <ul style="list-style-type: none"> <li>◆ Consider testing for Strongyloides infections to avoid hyper-infection syndrome and disseminated strongyloidiasis, particularly in patients over 50 years of age with a history of residence in Kagoshima and Okinawa Prefectures who will be treated with immunosuppressive drugs, anticancer drugs, or steroids.</li> </ul>                                                                                                                                                                                                                                                                                                                                                                                                                                                                                                                                                                                                       |

Note: We have no specific recommendations for dracunculiasis, human African trypanosomiasis, onchocerciasis, trachoma, and yaws. We consider that these diseases are not Japan's priority because we did not find any evidence of domestic transmission nor imported cases.

<https://doi.org/10.1371/journal.pntd.0011854.t003>

was used to discuss and reach a consensus. The discussion did not involve any assessment of the ethical, economic, and operational aspects of these recommendations, and thus, we do not intend to provide instruction about which recommendations should be prioritized. In addition to these disease-specific recommendations, we also identified three policy issues across disease areas as discussed below.

First, we argue that some NTDs require a legal basis for better public health response. Our review suggests that the government provides organized responses to the NTDs that are already covered by the Infectious Disease Control Law (Table 1). This law classifies infectious diseases into five categories based on each disease's infectivity and severity. It then defines the roles of stakeholders to organize reporting, prevention, and healthcare provision. In general, diseases that are considered highly infective or severe, such as Ebola virus disease, tuberculosis, and cholera, are classified into Class I, II, or III. Other infectious diseases whose infectivity or severity are not considered so problematic are classified into Class IV or V (Table 4). Although NTDs are not highly infective or severe diseases, we argue that some NTDs are yet eligible for Class IV or V, as Table 4 explains. Establishing a legal basis for these NTDs can be a critical step to advancing their surveillance and control in Japan. In addition, snakebite envenoming would need similar legal support outside of the Infectious Disease Control Law.

Next, we propose that the government should be more responsible for securing the provision of NTD-related health products that are not commercially available in Japan. For

Table 4. Infectious Disease Control Law and NTDs that can be designated by this law.

| How are diseases classified by the law? |                                                                                                                                                                                                                                                    |                                                                                                                                                                                              |                                                                                                                                                                                                | Which NTD can fit the law's classification? |                                                                                                                                                                                                                                                                                                            |
|-----------------------------------------|----------------------------------------------------------------------------------------------------------------------------------------------------------------------------------------------------------------------------------------------------|----------------------------------------------------------------------------------------------------------------------------------------------------------------------------------------------|------------------------------------------------------------------------------------------------------------------------------------------------------------------------------------------------|---------------------------------------------|------------------------------------------------------------------------------------------------------------------------------------------------------------------------------------------------------------------------------------------------------------------------------------------------------------|
| Class                                   | Definition of the class by the law <sup>1</sup>                                                                                                                                                                                                    | Examples of diseases already designated by the law                                                                                                                                           | Interpretation of classification by the Ministry of Health, Labour, and Welfare <sup>2</sup>                                                                                                   | NTDs to be designated                       | Rationale                                                                                                                                                                                                                                                                                                  |
| Class IV                                | [A]ny known infectious disease [. . .] which is transmissible to human beings through animals or animal corpses, food or drink, clothing, bedding, or other physical items and which is likely to affect the health of citizens (Article 6-5)-(xi) | Hepatitis E, hepatitis A, yellow fever, Q fever, rabies, anthrax, avian influenza, botulism, malaria, and tularemia                                                                          | Diseases that are not classified into Class I, II, or III [i.e., infectivity and severity of illness is relatively low] and that are mainly transmitted to humans via animals and other items. | Scabies                                     | Mites are transmissible to human beings through clothing and bedding. Scabies is widely spread in Japan and its outbreaks are regularly reported. More than 80,000 incident cases per year are estimated. The government should standardize and guide response to scabies outbreaks, such as mite control. |
| Class V                                 | [A]ny known infectious disease (excluding Class IV Infectious Diseases) [. . .] which is likely to affect the health of citizens (Article 6-6)-(ix)                                                                                                | Influenza, viral hepatitis, cryptosporidiosis, acquired immunodeficiency syndrome, genital chlamydia infection, syphilis, measles, and methicillin-resistant Staphylococcus aureus infection | Diseases whose surveillance data need to be provided to the public and healthcare workers.                                                                                                     | Buruli ulcer                                | It is transmitted within Japan, but its surveillance is voluntarily conducted by NIID. Dermatologists should be informed for better case findings.                                                                                                                                                         |
|                                         |                                                                                                                                                                                                                                                    |                                                                                                                                                                                              |                                                                                                                                                                                                | Chagas disease                              | 3,000–4,500 infected people are estimated to live in Japan, with a few cases of mother-to-child transmission. No surveillance is in place. The public and healthcare workers should be informed, particularly in Latino communities.                                                                       |
|                                         |                                                                                                                                                                                                                                                    |                                                                                                                                                                                              |                                                                                                                                                                                                | Clonorchiasis                               | Imported and domestic cases are confirmed in Japan but no surveillance is in place. The public and healthcare workers should be informed, particularly in areas where domestic transmission has been found.                                                                                                |
|                                         |                                                                                                                                                                                                                                                    |                                                                                                                                                                                              |                                                                                                                                                                                                | Cysticercosis                               | Cases are reported among immigrants and Japanese travelers. Domestic transmission cannot be ruled out. No surveillance is active for this disease. The public and healthcare workers should be informed for better case findings.                                                                          |
|                                         |                                                                                                                                                                                                                                                    |                                                                                                                                                                                              |                                                                                                                                                                                                | Fascioliasis                                | This disease is endemic in Japan with some imported cases found. No surveillance is in place. The public and healthcare workers should be informed, particularly in areas where domestic transmission has been found.                                                                                      |
| Leprosy                                 | Imported cases and cases from past infections are being found in Japan. Its surveillance is voluntarily conducted by NIID. Dermatologists should be informed for better case findings.                                                             |                                                                                                                                                                                              |                                                                                                                                                                                                |                                             |                                                                                                                                                                                                                                                                                                            |

(Continued)

Table 4. (Continued)

| How are diseases classified by the law? |                                                 |                                                    |                                                                                              | Which NTD can fit the law's classification?       |                                                                                                                                                                                                                                                       |
|-----------------------------------------|-------------------------------------------------|----------------------------------------------------|----------------------------------------------------------------------------------------------|---------------------------------------------------|-------------------------------------------------------------------------------------------------------------------------------------------------------------------------------------------------------------------------------------------------------|
| Class                                   | Definition of the class by the law <sup>1</sup> | Examples of diseases already designated by the law | Interpretation of classification by the Ministry of Health, Labour, and Welfare <sup>2</sup> | NTDs to be designated                             | Rationale                                                                                                                                                                                                                                             |
|                                         |                                                 |                                                    |                                                                                              | Mycetoma, chromoblastomycosis, and sporotrichosis | These diseases are endemic in Japan. No surveillance is in place. The public and healthcare workers should be informed for better case findings, particularly in epidemic areas.                                                                      |
|                                         |                                                 |                                                    |                                                                                              | Paragonimiasis                                    | This disease is endemic in Japan with some imported cases found. No surveillance is in place. The public and healthcare workers should be informed, particularly in areas where domestic transmission has been found.                                 |
|                                         |                                                 |                                                    |                                                                                              | Strongyloidiasis                                  | Imported and domestic cases are confirmed in Japan. At least 15 cases are found per year, but no surveillance is in place. Healthcare workers, particularly those who attend to immunosuppressed patients, should be informed about better treatment. |

1. English translation of the articles is extracted from the Japanese Law Translation database (<http://www.japaneselawtranslation.go.jp/>) provided by the Ministry of Justice, Japan.

2. Reference material presented at the third meeting of the Health Sciences Council (Taskforce for Infectious Diseases) held on March 14, 2014. Available from <https://www.mhlw.go.jp/file/05-Shingikai-10601000-Daijinkanboukouseikagakuka-Kouseikagakuka/0000040509.pdf>

<https://doi.org/10.1371/journal.pntd.0011854.t004>

instance, diagnostics for Chagas disease, foodborne trematodiasis, lymphatic filariasis, and schistosomiasis are produced or purchased by researchers doing investigations on each disease. Similarly, the yamakagashi antivenom is produced only by a research group at the Japanese Snake Center. In addition, medicines for Chagas disease and fascioliasis are not approved in Japan, although they are listed as essential medicines by WHO. Currently, the Research Group of Tropical Diseases and Parasitic Diseases stores triclabendazole for fascioliasis. These NTD products can become unavailable when research funds are discontinued. The government can allocate a budget for securing NTD products, or more preferably, can create a new office to address this problem within public institutions, such as the National Institute of Infectious Diseases or the National Center of Global Health and Medicine.

Finally, we emphasize the importance of addressing the unaffordability of treatment using unapproved drugs. In Japan, treatment of Chagas disease and fascioliasis requires the use of unapproved drugs (Table 1). Unapproved drugs are not covered by health insurance and, in the worst case, patients can be required to fully pay for all health services received. To ensure patient affordability, obtaining PMDA approval is the standard way so that these drugs can be covered by insurance. However, this option can be possible only when manufacturers make decisions to apply for PMDA approval. Alternatively, patients can receive unapproved drugs for free when they are enrolled in clinical trials. Although the main purpose of a clinical trial is not to protect patients from financial risks, this seems to be the only realistic way to ensure the affordability of unapproved medicines. At the time of this writing, a clinical trial of



triclabendazole for fascioliasis is recruiting patients [312]. Launching clinical trials would also be recommended for benznidazole and nifurtimox.

Our review involves several limitations. First, our search strategy may have been unable to find some relevant publications, particularly when the Japanese databases register papers using different disease names than the controlled terms that we adopted as search terms. Second, NTD cases are likely to be underdiagnosed in Japan, which leads to an underestimation of the burden of NTDs. Even if diagnosed, cases usually remain undocumented when medications are not available. Third, our review may involve our own bias. Each author had more knowledge and expertise in one or a few disease areas, which could influence the literature search and writing processes. To minimize this potential bias, we developed the search protocol together. Each author read through the manuscript and any disagreements were resolved through group discussion. Lastly, our discussions of public health response assessed the availability of laboratory testing and medicines, but we could not fully assess whether they are accessible to patients. Further research on access to NTD health technologies in Japan is required.

In conclusion, our review found that 15 out of 20 NTDs can be considered important public health concerns in Japan. Among these 15 NTDs, some are transmitted within Japan and others are imported from endemic countries. Japan's health systems address only a portion of 15 NTDs, particularly five diseases that are targeted by the Infectious Disease Control Law. NTD control often requires support from the public sector. Strengthening government support for nationwide surveillance of NTDs as well as for ensuring the availability and affordability of NTD-related health technologies, can be a critical step to advancing NTD control in Japan. Our illustration of NTDs in Japan also implies that even high-income countries should study, recognize, and address NTDs to reduce health disparities within their own countries.

## Supporting information

**S1 Document. Results of literature search with three databases.**

(XLSX)

**S2 Document. List of selected articles by diseases.**

(DOCX)

**S3 Document. Map of Japan showing geographical locations of prefectures and regions that are mentioned in this review.**

(DOCX)

## Author Contributions

**Conceptualization:** Yuriko Harada, Hanako Iwashita, Taeko Moriyasu, Sachiyo Nagi, Nobuo Saito, Kota Yoshioka.

**Data curation:** Yuriko Harada, Hanako Iwashita, Taeko Moriyasu, Sachiyo Nagi, Nobuo Saito, Mariko Sugawara-Mikami, Kota Yoshioka, Rie Yotsu.

**Formal analysis:** Yuriko Harada, Hanako Iwashita, Taeko Moriyasu, Sachiyo Nagi, Nobuo Saito, Mariko Sugawara-Mikami, Kota Yoshioka, Rie Yotsu.

**Funding acquisition:** Kota Yoshioka.

**Methodology:** Yuriko Harada, Hanako Iwashita, Taeko Moriyasu, Sachiyo Nagi, Nobuo Saito, Kota Yoshioka.

**Project administration:** Kota Yoshioka.

**Writing – original draft:** Yuriko Harada, Hanako Iwashita, Taeko Moriyasu, Sachiyo Nagi, Nobuo Saito, Mariko Sugawara-Mikami, Kota Yoshioka, Rie Yotsu.

**Writing – review & editing:** Hanako Iwashita, Taeko Moriyasu, Sachiyo Nagi, Nobuo Saito, Kota Yoshioka, Rie Yotsu.

## References

1. World Health Organization. Ending the neglect to attain the Sustainable Development Goals: A road map for neglected tropical diseases 2021–2030 [Internet]. Geneva; 2020 [cited 2021 Mar 22]. Available from: <https://www.who.int/publications-detail-redirect/9789240010352>.
2. Fitzpatrick C, Nwankwo U, Lenk E, de Vlas SJ, Bundy DAP. An Investment Case for Ending Neglected Tropical Diseases. In: Holmes KK, Bertozzi S, Bloom BR, Jha P, editors. Major Infectious Diseases [Internet]. 3rd ed. Washington (DC): The International Bank for Reconstruction and Development / The World Bank; 2017 [cited 2021 Mar 22]. Available from: <http://www.ncbi.nlm.nih.gov/books/NBK525199/>.
3. Fitzpatrick C, Engels D. Leaving no one behind: a neglected tropical disease indicator and tracers for the Sustainable Development Goals. *Int Health*. 2016 Mar; 8 Suppl 1:i15–18. <https://doi.org/10.1093/inthealth/ihw002> PMID: 26940304
4. Hotez PJ. Ten Global “Hotspots” for the Neglected Tropical Diseases. *PLoS Negl Trop Dis* [Internet]. 2014 May 29 [cited 2021 Mar 22];8(5). Available from: <https://www.ncbi.nlm.nih.gov/pmc/articles/PMC4038631/>.
5. Hotez PJ. NTDs V.2.0: “Blue Marble Health”—Neglected Tropical Disease Control and Elimination in a Shifting Health Policy Landscape. *PLoS Negl Trop Dis*. 2013 Nov 21;7(11):e2570.
6. Abbas M, Aloudat T, Bartolomei J, Carballo M, Durieux-Paillard S, Gabus L, et al. Migrant and refugee populations: a public health and policy perspective on a continuing global crisis. *Antimicrob Resist Infect Control*. 2018; 7:113. <https://doi.org/10.1186/s13756-018-0403-4> PMID: 30250735
7. Booth M. Climate Change and the Neglected Tropical Diseases. *Adv Parasitol*. 2018; 100:39–126. <https://doi.org/10.1016/bs.apar.2018.02.001> PMID: 29753342
8. Tilli M, Botta A, Bartoloni A, Corti G, Zammarchi L. Hospitalization for Chagas disease, dengue, filariasis, leishmaniasis, schistosomiasis, strongyloidiasis, and Taenia solium taeniasis/cysticercosis, Italy, 2011–2016. *Infection*. 2020 Oct; 48(5):695–713. <https://doi.org/10.1007/s15010-020-01443-2> PMID: 32418191
9. Zammarchi L, Gobbi F, Angheben A, Spinicci M, Buonfrate D, Calleri G, et al. Schistosomiasis, strongyloidiasis and Chagas disease: the leading imported neglected tropical diseases in Italy. *J Travel Med*. 2020 Feb 3; 27(1). <https://doi.org/10.1093/jtm/taz100> PMID: 31840757
10. Hotez PJ. The rise of neglected tropical diseases in the ‘new Texas’. *PLoS Negl Trop Dis*. 2018 Jan; 12(1):e0005581.
11. Ministry of Foreign Affairs of Japan. JAPAN SDGs Action Platform - SDG Indicators [Internet]. [cited 2021 Mar 23]. Available from: <https://www.mofa.go.jp/mofaj/gaiko/oda/sdgs/statistics/goal3.html>.
12. Munn Z, Peters MDJ, Stern C, Tufanaru C, McArthur A, Aromataris E. Systematic review or scoping review? Guidance for authors when choosing between a systematic or scoping review approach. *BMC Med Res Methodol*. 2018 Nov 19; 18(1):143. <https://doi.org/10.1186/s12874-018-0611-x> PMID: 30453902
13. Tricco AC, Lillie E, Zarin W, O'Brien KK, Colquhoun H, Levac D, et al. PRISMA Extension for Scoping Reviews (PRISMA-ScR): Checklist and Explanation. *Ann Intern Med*. 2018 Oct 2; 169(7):467–73. <https://doi.org/10.7326/M18-0850> PMID: 30178033
14. Agency Digital, Government of Japan. e-Gov Law Search [Internet]. Available from: <https://elaws.e-gov.go.jp/>.
15. National Institute of Infectious Diseases, Japan. Infectious Diseases Weekly Report [Internet]. Available from: <https://www.niid.go.jp/niid/ja/idwr.html>.
16. Pharmaceuticals and Medical Devices Agency. Pharmaceuticals Information Search [Internet]. Available from: <https://www.pmda.go.jp/PmdaSearch/iyakuSearch/>.
17. National Institute of Infectious Diseases, Japan. Laboratory Manuals for Pathogen Detection [Internet]. Available from: <https://www.niid.go.jp/niid/ja/labo-manual.html>.
18. Japanese Association for Infectious Diseases, Japanese Society for Clinical Microbiology. Infectious Diseases Map for Advanced Progressive Laboratory Tests:IDMAP [Internet]. Available from: <https://www.kansensho.or.jp/modules/idmap/idmap.html>.

19. World Health Organization. Electronic Essential Medicines List [Internet]. Available from: <https://list.essentialmeds.org/>.
20. World Health Organization. Fact sheets [Internet]. Available from: <https://www.who.int/news-room/fact-sheets>.
21. Research Group of Tropical Diseases and Parasitic Diseases. Medicines stored by our research group [Internet]. [cited 2020 Oct 16]. Available from: <https://www.nettai.org/%E4%BF%9D%E7%AE%A1%E8%96%AC%E5%89%A4/>.
22. Nakanaga K, Hoshino Y, Yotsu RR, Makino M, Ishii N. Nineteen cases of Buruli ulcer diagnosed in Japan from 1980 to 2010. *J Clin Microbiol*. 2011 Nov; 49(11):3829–36. <https://doi.org/10.1128/JCM.00783-11> PMID: 21880966
23. Ohtsuka M, Kikuchi N, Yamamoto T, Suzutani T, Nakanaga K, Suzuki K, et al. Buruli ulcer caused by *Mycobacterium ulcerans* subsp *shinshuense*: a rare case of familial concurrent occurrence and detection of insertion sequence 2404 in Japan. *JAMA Dermatol*. 2014 Jan; 150(1):64–7. <https://doi.org/10.1001/jamadermatol.2013.6816> PMID: 24196016
24. Imai K. Chagas disease [in Japanese]. *Rinsho Biseibutsu Clin Microbiol*. 2014; 41(4):353–7.
25. Miura S. Infectious diseases - Chagas disease and its current situation in Japan [in Japanese]. *Nihon Iji Shimpo Jpn Med J*. 2018;(4928):55–6.
26. Imai K, Misawa K, Osa M, Tarumoto N, Sakai J, Mikita K, et al. Chagas disease: a report of 17 suspected cases in Japan, 2012–2017. Vol. 47, *Tropical Medicine and Health*. 2019. p. 1–5.
27. Ono T, Miyahira Y. Current parasitic, insect and animal-borne diseases: 1- imported parasitic diseases among children [in Japanese]. *Shonika Rinsho Jpn J Pediatr*. 2012; 65(3):360–8.
28. Ikeno Y, Miura S, Sayama Y, Fukushima F, Sakio H, et al. A case of Chagas disease patient who was treated with benznidazole [in Japanese]. Vol. 26, *Nihon Rinsyo Kiseichu Gakkaishi (Clinical Parasitology)*. 2015. p. 90–2.
29. Ikeno Y, Miura S, Maeda T, Imai K, Sayama Y, et al. A case of chronic Chagas disease patient who was treated with benznidazole and kept remission for five years [in Japanese]. Vol. 30, *Nihon Rinsyo Kiseichu Gakkaishi (Clinical Parasitology)*. 2019. p. 62–4.
30. Imai K, Maeda T, Sayama Y, Osa M, Mikita K, Kurane I, et al. Chronic Chagas disease with advanced cardiac complications in Japan: Case report and literature review. *Parasitol Int*. 2015 Oct; 64(5):240–2. <https://doi.org/10.1016/j.parint.2015.02.005> PMID: 25744336
31. Maeda T, Nanun M, Sayama Y, Misawa K, Imai K, et al. Two cases of Chagas disease with benznidazole treatment [in Japanese]. Vol. 24, *Rinsho To Biseibutsu (Clinical Microbiology)*. 2013. p. 33–6.
32. Yuan B, Nishiura H. Estimating the actual importation risk of dengue virus infection among Japanese travelers. *PLoS One*. 2018; 13(6):e0198734. <https://doi.org/10.1371/journal.pone.0198734> PMID: 29924819
33. Kutsuna S, Kato Y, Moi ML, Kotaki A, Ota M, Shinohara K, et al. Autochthonous dengue fever, Tokyo, Japan, 2014. *Emerg Infect Dis*. 2015 Mar; 21(3):517–20. <https://doi.org/10.3201/eid2103.141662> PMID: 25695200
34. Kori M, Awano N, Inomata M, Kuse N, Tone M, Yoshimura H, et al. The 2014 autochthonous dengue fever outbreak in Tokyo: A case series study and assessment of the causes and preventive measures. *Respir Med Case Rep*. 2020; 31:101246. <https://doi.org/10.1016/j.rmcr.2020.101246> PMID: 33134072
35. Ujiie M. Deaths due to dengue in Japanese travellers. *J Travel Med*. 2021 Jul 7; 28(5). <https://doi.org/10.1093/jtm/taab076> PMID: 34002239
36. Ishikawa H, Shimogawara R. Risk Assessment of Dengue Autochthonous Infections in Tokyo during Summer, Especially in the Period of the 2020 Olympic Games. *Jpn J Infect Dis*. 2019 Nov 21; 72(6):399–406. <https://doi.org/10.7883/yoken.JJID.2019.094> PMID: 31366859
37. Kutsuna S, Kato Y, Katanami Y, Yamamoto K, Takeshita N, Hayakawa K, et al. A Retrospective Single-center Analysis of 16 Cases of Imported Chikungunya Fever in Japan. *Intern Med*. 2018; 57(3):325–8. <https://doi.org/10.2169/internalmedicine.8196-16> PMID: 29093380
38. Nakayama E, Tajima S, Kotaki A, Shibasaki K, Itokawa K, Kato K, et al. A summary of the imported cases of Chikungunya fever in Japan from 2006 to June 2016. *J Travel Med [Internet]*. 2018 Jan 1 [cited 2021 Feb 25]; 25(1). Available from: <https://academic.oup.com/jtm/article/doi/10.1093/jtm/tax072/4763690>. <https://doi.org/10.1093/jtm/tax072> PMID: 29394382
39. Kimura M, Toukairin A, Tatezaki H, Tanaka S, Harada K, Araiya J, et al. *Echinococcus multilocularis* detected in slaughtered pigs in Aomori, the northernmost prefecture of mainland Japan. *Jpn J Infect Dis*. 2010 Jan; 63(1):80–1. PMID: 20093772

40. Chida K, Kamiyama T, Kakisaka T, Yokoo H, Hatanaka K, Taketomi A. A Case of Hepatic Alveolar Echinococcosis with Complete Obstruction of the Inferior Vena Cava [in Japanese]. *Nihon Rinsho Geka Gakkai Zasshi J Jpn Surg Assoc.* 2015; 76(5):1124–9.
41. Ojima H, Kanai Y. Alveolar echinococcosis - hint for diagnosis [in Japanese]. In: *Byori To Rinsho (Pathology and Clinical Medicine)* [Internet]. Bunkodo; 2019 [cited 2021 Jan 15]. p. 203–5. Available from: <http://mol.medicalonline.jp/library/journal/abstract?GoodsID=ag9brysh/2019/0037s1/058&name=0203-0205j&UserID=1100001448-00>.
42. Sunahara M, Kamiyama T, Sato N, Kurauchi N, Suzuki S, Kimura J. A Case of Hepatic Alveolar Echinococcosis with Peritoneal Dissemination. *Nihon Rinsho Geka Gakkai Zasshi J Jpn Surg Assoc.* 2013; 74(10):2857–62.
43. Yoshida T, Kamiyama T, Okada T, Nakanishi K, Yokoo H, Kamachi H, et al. Alveolar echinococcosis of the liver in children. Vol. 17, *Journal of Hepato-Biliary-Pancreatic Sciences.* 2010. p. 152–7. <https://doi.org/10.1007/s00534-009-0114-6> PMID: 19390771
44. Matsudaira S, Ishizaki Y, Yoshimoto J, Imamura H, Fukumura Y, Kawasaki S. A Case of Hepatic Alveolar Echinococcosis Treated Radically by Hepatectomy 29 Years after Infection by Echinococcus multilocularis. *Nihon Rinsho Geka Gakkai Zasshi J Jpn Surg Assoc.* 2018; 79(10):2145–9.
45. Osawa E, Tsuchida T, Numada K, Yoneyama K, Kasahara A, Murakami A, et al. A case of alveolar echinococcosis of the liver in a resident of Kanagawa Prefecture which was difficult to diagnose [in Japanese]. Vol. 63, *Yokohama Igaku (Yokohama Medical Journal).* 2012. p. 605–9.
46. Kataoka R, Kojima K. A case of alveolar echinococcosis of the liver presented without associated history [in Japanese]. Vol. 62, *Rinsho Houshasen (Japanese Journal of Clinical Radiology).* 2017. p. 571–4.
47. Hata R, Toyama M, Ichimura Y, Sawada Y, Kaneko M. A case of echinococcosis of the liver involving parent and child [in Japanese]. *Jpn J Med Technol.* 2014; 63(1):69–73.
48. Okada F, Kumai Y, Sato H, Ohbayashi H, Ono A, Ando Y, et al. Image diagnosis of infectious diseases - image findings of parasitic diseases in lung [in Japanese]. Vol. 73, *Nihon Kyobu Rinsho (The Japanese Journal of Chest Diseases).* 2014. p. 1451–9.
49. Oku Y. Echinococcosis [in Japanese]. Vol. 33, *Kagaku Ryoho no Ryoiki (Antibiotics & Chemotherapy).* 2017. p. 428–35.
50. Nakamura K, Ito A, Yara S, Haranaga S, Hibiya K, Hirayasu T, et al. A case of pulmonary and hepatic cystic Echinococcosis of CE1 stage in a healthy Japanese female that was suspected to have been acquired during her stay in the United Kingdom. *Am J Trop Med Hyg.* 2011 Sep; 85(3):456–9. <https://doi.org/10.4269/ajtmh.2011.11-0112> PMID: 21896804
51. Kuchikata T. A case of 13-year-old girl with look-alike hepatophyma [in Japanese]. Vol. 77, *Shonika Shinryo (The Journal of Pediatric Practice).* 2014. p. 553–6.
52. Morishima Y, Ichimura S, Yamazaki H, Sugiyama H. Cystic echinococcosis in a Nepalese person - infection of heart with Echinococcus ortleppi [in Japanese]. Vol. 25, *Clinical Parasitology.* 2014. p. 99–101.
53. Tanaka T, Hirata T, Aragaki S, Higashiarakawa M, Kishimoto K, et al. A case of cystic echinococcosis in an international student from Nepal [in Japanese]. Vol. 25, *Clinical Parasitology.* 2014. p. 95–8.
54. Yamashita N, Hirai T, Ito T. A case of liver cystic echinococcosis. *J Gastroenterol Cancer Screen.* 2010; 48(1):61–6.
55. Yoshida Y. Clonorchiasis—a historical review of contributions of Japanese parasitologists. *Parasitol Int.* 2012 Mar; 61(1):5–9. <https://doi.org/10.1016/j.parint.2011.06.003> PMID: 21749930
56. Matsubayashi J, Taira K, Yogo A, Kito Y, Ura K, Toyota E, et al. Intrahepatic Bile Duct Carcinoma with Clonorchiasis [in Japanese]. *Jpn J Gastroenterol Surg.* 2015; 48(4):328–36.
57. Kominami Y, Aikata H, Hiramatsu K, Tanaka M, Naeshiro N. A case of clonorchiasis complicated with the expansion of liver cyst [in Japanese]. *J Jpn Soc Gastroenterol.* 2013; 110(3):456–64.
58. Ikehara M, Komase Y, Morita A, Yamaguchi H, Yamamoto T. Paragonimiasis in a person whose symptoms were shown 22 years after emigrating to Japan from Laos. *J Infect Chemother Off J Jpn Soc Chemother.* 2010 Feb; 16(1):49–52.
59. Hoshina T, Tamura K, Kawano S, Kato T, Sato F, Horino T, et al. Two cases of Paragonimiasis westermani in a Chinese family diagnosed with the Ouchterlony double diffusion method. *Kansenshogaku Zasshi.* 2014 Nov; 88(6):866–70. <https://doi.org/10.11150/kansenshogakuzasshi.88.866> PMID: 25764810
60. Okamoto H, Uramoto H, Mimura Y, Hoshida Y. Two cases of paragonimiasis verified by the presence of eggs in sputum cytology specimens. *J Jpn Soc Clin Cytol.* 2014; 53(4):292–7.
61. Sakurai T, Watanabe Y, Inui A, Oshima H, Isonuma H, Dambara T, et al. A case of human fascioliasis infected from eating watercress in Japan. *Jpn J Hosp Gen Med.* 2013; 5(2):62–6.

62. Sato Y, Takasaka Y. A Case of Fascioliasis Suspected of being a Malignant Tumor. *Nihon Gekakei Rengo Gakkaishi J Jpn Coll Surg*. 2011; 36(5):850–5.
63. Yamanaka Y, Takeuchi M. A Case of fascioliasis [in Japanese]. *Kanzo*. 2020; 61:607–12.
64. Imai K, Tarumoto N, Amo K, Takahashi M, Sakamoto N, Kosaka A, et al. Non-invasive diagnosis of cutaneous leishmaniasis by the direct boil loop-mediated isothermal amplification method and MinION nanopore sequencing. *Parasitol Int*. 2018; 67(1):34–7.
65. Ono M, Takahashi K, Taira K, Uezato H, Takamura S, Izaki S. Cutaneous leishmaniasis in a Japanese returnee from West Africa successfully treated with liposomal amphotericin B. *J Dermatol*. 2011; 38(11):1062–5. <https://doi.org/10.1111/j.1346-8138.2011.01270.x> PMID: 21950705
66. Tsujimoto K, Nakagawa T, Uno K, Yamada Y, Ogawa T, Kasahara K, et al. A case of a cutaneous leishmaniasis patient who developed symptoms in Brazil [in Japanese]. Vol. 23, *Clinical Parasitology*. 2012. p. 34–6.
67. Okumura Y, Yamauchi A, Nagano I, Itoh M, Hagiwara K, Takahashi K, et al. A case of mucocutaneous leishmaniasis diagnosed by serology. *J Dermatol*. 2014; 41(8):739–42. <https://doi.org/10.1111/1346-8138.12564> PMID: 25041360
68. Matsuura H, Utsumi D, Fujimoto W, Mitekura H, Urishihara K, Uezato H. A case of a cutaneous leishmaniasis patient who was infected in Brazil [in Japanese]. Vol. 72, *Nishi Nihon Hifuka (The Nishinohon Journal of Dermatology)*. 2010. p. 116–20.
69. Ito K, Takahara M, Ito M, Oshiro M, Takahashi K, Uezato H, et al. An imported case of cutaneous leishmaniasis caused by *Leishmania (Leishmania) donovani* in Japan. *J Dermatol*. 2014; 41(10):926–8. <https://doi.org/10.1111/1346-8138.12609> PMID: 25228325
70. Tokoro M, Nakamoto K, Arai T, Kaneko Y, Hayashi N, Ueda M. A case of a visceral leishmaniasis patient coinfecting with HIV [in Japanese]. Vol. 20, *Clinical Parasitology*. 2010. p. 96–8.
71. National Institute of Infectious Diseases. Leprosy: information for the public [Internet]. 2021 [cited 2022 Mar 9]. Available from: <https://www.niid.go.jp/niid/ja/leprosy-m/1841-irc/1693-general.html>.
72. Yotsu R. Tropical diseases in Japan - bacteria - leprosy [in Japanese]. *Nihon Iji Shimpo (Japan Medical Journal)*. 2019. p. 36–7.
73. Nakamura I, Yamaguchi S, Kariya Y, Matori S, Taira K, Yamamoto Y, et al. Hansen's Disease of Lepromatous Type Occurring in a Micronesian US Soldier [in Japanese]. *Nishi Nihon Hifuka*. 2013; 75(4):326–30.
74. Namisato M. Leukoderma acquisitum centrifugum (halo nevus) developed following type 1 leprosy reaction [in Japanese]. *Jpn J Lepr*. 2018; 86(3):175–9.
75. Ukai Y, Sugimoto T, Kawauchi Y, Ohi T, Fujii N, Nakanishi T, et al. Case reports: Filipino BL type Hansen's disease that occurred in Japan [in Japanese]. Vol. 59, *Hifuka no Rinsho*. 2017. p. 675–8.
76. Nagaoka F, Itoh M, Kadozaka T, Takagi H. Cases of suspected filarial infection reported to our laboratory in the past five years (Japanese). *Nihon Rinsho Kiseichu Gakkaishi Clin Parasitol*. 2015; 26(1):68–70.
77. Ohtake S, Kurita H, Fujikawa N, Osada H, Nakashima Y, Itoh M, et al. A case of scrotal edema associated with filarial infection. *Jpn J Urol Surg*. 2016; 29(2):165–8.
78. Ichinomiya A, Nishimura K, Takenaka M, Utani A, Nishimoto K. Mycetoma caused by *Nocardia transvalensis* with repeated local recurrences for 25 years without dissemination to viscera. *J Dermatol*. 2014 Jun; 41(6):556–7. <https://doi.org/10.1111/1346-8138.12496> PMID: 24814643
79. Suzuki C, Shimoyama A, Itsunoi T, Sei Y. Diseases of fascia and subcutaneous tissue] Clinical case: Primary cutaneous nocardiosis (mycetoma type) on the buttocks [in Japanese]. Vol. 38, *Hifubyo Shinryou (Practical Dermatology)*. 2016. p. 29–32.
80. Mitomo T, Ushigome Y, Fukuda T, Karino Y, Shiohara T. Two cases of chromomycosis identified as *Fonsecaea monophora* by molecular phylogenetic analysis [in Japanese]. Vol. 57, *Medical Mycology Journal*. 2016. p. J133–9.
81. Sugiyama Y, Suzuki Y, Sugaya K, Tokura Y, Yaguchi T, Kamei K, et al. Chromoblastomycosis caused by *Fonsecaea monophora*. *Med Mycol J*. 2011; 52(3):255–60. <https://doi.org/10.3314/mmj.52.255> PMID: 21891988
82. Taniguchi T, Tsuji M, Takei K, Takahara M, Anzai K, Matsuda T, et al. A case of chromoblastomycosis due to *Fonsecaea monophora* treated with surgical excision [in Japanese]. Vol. 82, *Nishi Nihon Hifuka*. 2020. p. 289–93.
83. Yanagihara S, Kobayashi H, Kamo R, Hirata C, Hiruma M, Nishimura K, et al. Chromoblastomycosis caused by *Fonsecaea nubica*: First report from Japan. *J Dermatol*. 2015; 42(8):833–4. <https://doi.org/10.1111/1346-8138.12898> PMID: 25899774

84. Tsubomitsu T, Sawada M, Dekio G, Ninomiya A, Ishizaki J, Tanaka M, et al. A case of lymphangitic sporotrichosis in which the mechanism of spontaneous resolution was considered during the course of the disease [in Japanese]. Vol. 35, *Nihon Rinsho Hifuka Ikai Zasshi (Journal of the Japan Organization of Clinical Dermatologists)*. 2018. p. 508–13.
85. Kurihara Y, Matsumoto N, Hata Y, Doki T, Miyakawa S. A case of sporotrichosis with white colonies arising from a rat bite [in Japanese]. Vol. 31, *Nihon Rinsho Hifuka Ikai Zasshi (Journal of the Japan Organization of Clinical Dermatologists)*. 2014. p. 477–80.
86. Sakamoto T, Ushigami T, Anzai K, Fujii T, Abe S, Mochizuki T, et al. A case of sporotrichosis rapidly diagnosed by Direct PCR [in Japanese]. Vol. 9, *Hifu No Kagaku (Skin Research)*. 2010. p. 254–9.
87. Naka W. Educational Series Superficial mycosis Sporotrichosis [in Japanese]. Vol. 53, *Medical Mycology Journal*. 2012. p. 163–7.
88. Watanabe T, Kamei K. Import fungal disease [in Japanese]. Vol. 31, *Kokyu*. 2012. p. 1106–10.
89. Kurosawa A, Tojinbara K, Kadowaki H, Hampson K, Yamada A, Makita K. The rise and fall of rabies in Japan: A quantitative history of rabies epidemics in Osaka Prefecture, 1914–1933. *PLoS Negl Trop Dis*. 2017; 11(3):e0005435. <https://doi.org/10.1371/journal.pntd.0005435> PMID: 28333929
90. National Institute of Infectious Diseases. Scabies [in Japanese] [Internet]. 2015. Available from: <https://www.niid.go.jp/niid/ja/kansennohanashi/380-itch-intro.html>.
91. Amada D. A case of patient with autism spectrum disorder and crusted (Norwegian) scabies [in Japanese]. Vol. 37, *Nihon Primary case Rengou Gakkaishi*. 2014. p. 340–1.
92. Kasamatsu Y, Shirano M, Goto S. A case of AIDS with exacerbation of generalized scabies throughout the body by IRIS [in Japanese]. Vol. 25, *Clinical Parasitology*. 2014. p. 68–70.
93. Takai T, Kawata Y, Nakamura K, Murata Y. Scabies Infestation within the Horny Layer of a Facial Hyperkeratotic Nodule [in Japanese]. Vol. 124, *Nihon Hifuka Gakkaizasshi*. 2014. p. 2299–303.
94. Ichinomiya A, Nishimoto K. Case of scabies at Nagasaki Ekisaikai Hospital during the two years from September 2013 to August 2015 [in Japanese]. Vol. 16, *Nagasaki-ekisaikai-byouinkaihou*. 2015. p. 1–5.
95. Hattori M, Kanazawa N. Two epidemic outbreaks of scabies [in Japanese]. Vol. 33, *Nihon Rinsho Hifukaikai Zasshi*. 2016. p. 383–8.
96. Mashima E, Haruyama S, Yoshioka H, Yamada Y, Nakamura M. Case report of scabies among five siblings treated as intractable eczema [in Japanese]. Vol. 35, *Nihon Shounihifuka gakkaizasshi*. 2016. p. 51–5.
97. Shiroyama R, Igarashi R, Honda Y, Yoshida T, Oshida K, Higuchi S, et al. A Case of Infantile Scabies Difficult to Differentiate from Multisystem Langerhans Cell Histiocytosis [in Japanese]. Vol. 122, *Nihon Shounika Gakkai Zasshi (The journal of the Japan Pediatric Society)*. 2018. p. 760–6.
98. Aragaki A, Shirono M. Review of the measures against outbreaks of scabies in the psychiatric ward in Japan [in Japanese]. Vol. 61, *Nihon Seishinka Kango Gakujuutsuyuukaishi*. 2020. p. 17–21.
99. Machida K, Yamada T, Shimura E, Umemura M, Onoue S, Kaneko M, et al. Schistosomiasis japonica in a patient who emigrated from China: a case report [in Japanese]. Vol. 115, *Nihon Shokakibyō Gakkai Zasshi*. 2018. p. 1094–100.
100. Hosho K, Ikebuchi Y, Ueki M, Nakamura K, Yashima K, Maeda N, et al. Schistosoma Japonica identified by laparoscopic and colonoscopic examination. Vol. 22, *Digestive Endoscopy*. 2010. p. 133–6.
101. Yanagisawa S, Yuasa T, Tanaka T. Clinical Diagnosis of Schistosoma japonicum Infection Complicating Infective Endocarditis and Liver Cirrhosis. Vol. 49, *Internal Medicine*. 2010. p. 1001–5. <https://doi.org/10.2169/internalmedicine.49.3121> PMID: 20519816
102. Ema A, Imai S, Nakagawa M, Kumamoto Y, Nagase T, Kanai T. A case of acute appendicitis with ova of Schistosoma [in Japanese]. Vol. 72, *The Journal of the Japan Surgical Association*. 2011. p. 1773–7.
103. Mori T, Matsumoto S, Imoto Y, Shinomiya H, Wada S. Schistosoma japonicum found in an area not endemic [in Japanese]. Vol. 55, *Acta hepatologica Japonica*. 2014. p. 254–8.
104. Ishihara R, Hashimoto A, Saiki R, Ikenoyama Y, Tahara Y. A case of Schistosomiasis japonica with a history of living in the Philippines [in Japanese]. Vol. 26, *Clinical Parasitology*. 2015. p. 52–4.
105. Murayama S, Nomura S, Kaneko M, Honma Y, Takemura T, Tomita K. Infection with schistosomal parasites in Africa [in Japanese]. Vol. 66, *Japanese journal of clinical urology*. 2012. p. 319–22.
106. Hasegawa Y, Nishii M, Masui S, Yoshio Y, Kanda H, Kanai M, et al. Urinary schistosomiasis: report of a case [in Japanese]. *Hinyokika Kyo*. 2014 Feb; 60(2):91–4.
107. Mizuno Y, Hayashi N, Chigusa Y. A case of bilharziasis with calcification of the seminal vesicle [in Japanese]. Vol. 26, *Clinical Parasitology*. 2015. p. 49–51.
108. Miike T, Sakamoto Y. Perfect cure of diseases caused by summer animals - snakebites [in Japanese]. *Derma*. 2018. p. 66–76.

109. Tajika M. Main points of diagnosis and treatment of snakebites [in Japanese]. *Thromb Med*. 2014; 4(3):286–90.
110. Yoneda M, Nakamura T, Mori S, Kurai M, Yoshino A, Ito M, et al. Five cases of mamushi bites and their treatment [in Japanese]. *Nihon Shounikaikai Kaiho (The Journal of the Japan Pediatric Association)*. 2017. p. 197–201.
111. Okamoto O, Nakashima R, Yamamoto S, Hashimoto T, Takasaki T, Tokuda H, et al. A lethal case of mamushi (*Gloydius blomhoffii*) bite: severe bowel symptoms as a lethal sign. *Acute Med Surg*. 2017 Jan; 4(1):135–9. <https://doi.org/10.1002/ams2.240> PMID: 29123851
112. Kawamoto K, Miyamoto K, Harada N, Yamashita N. A case of acute renal failure due to viper bite and clinical characteristics of 64 cases over 8 years [in Japanese]. Vol. 1, *Journal of Japan Society for Blood Purification in Critical Care*. 2010. p. 141–5.
113. Nakamura K, Ideno N, Murakami M, Ogawa Y, Momii S. A case of acute renal and respiratory failure due to mamushi bite [in Japanese]. *Nihon Kyukyu Igakukai Zasshi*. 2010; 21(10):843–8.
114. Tamehiro K, Shima H, Taki K. A survived case of serious viper bite complicated with acute renal failure [in Japanese]. Vol. 15, *Nihon Rinsho Kyukyu Igakukai Zasshi (Journal of Japanese Society for Emergency Medicine)*. 2012. p. 546–9.
115. Kawamura Y, Nagai M, Kuraishi N, Tamura M. A case of cerebral infarction associated with Japanese mamushi (*Gloydius blomhoffii*) bite [in Japanese]. *J Jpn Assoc Rural Med*. 2014; 63(1):57–60.
116. Kotake M, Suzuki S. Two cases that developed purulent osteomyelitis after mamushi bites [in Japanese]. Vol. 35, *Nihon Syugekagakkai Zasshi (The journal of Japanese Society for Surgery of the Hand)*. 2019. p. 1244–8.
117. Yoshimine S, Seyama A, Suga A, Murakami M, Hayashi M, Inoue T, et al. Clinical study of 67 cases of Japanese mamushi viper (*Gloydius blomhoffii*) bite [in Japanese]. *J Jpn Assoc Rural Med*. 2019; 68(4):468–74.
118. Ishikawa T, Soejima O, Nakagawa H, Kitamura T, Naito M. Five cases that developed compartment syndrome in hands and arms after mamushi bites [in Japanese]. Vol. 26, *Nihon Syugekagakkai Zasshi (The Journal of Japanese Society for Surgery of the Hand)*. 2010. p. 453–5.
119. Kimura N, Okabe N, Futamura-Nakagawa R, Koda F, Izumo A, Furue M. Clinical study of 81 cases of “mamushi” viper bite during the past 11 years [in Japanese]. *Nishi Nihon Hifuka*. 2015; 77(6):584–8.
120. Kushibe I, Kawai H, Takano D. Experience of hand therapy in a case of mamushi bite [in Japanese]. Vol. 9, *Nihon Hand Therapy Gakkaishi (The Journal of Japanese Hand Therapy Society)*. 2017. p. 96–100.
121. Fujii K, Harada D, Kujurai D, Kase K, Miyatake S. A case of a child bitten by mamushi and treated with antivenom [in Japanese]. Vol. 38, *Nihon Kyukyu Igakukai Kanto Chihokai Zasshi (KANTO Journal of Japanese Association for Acute Medicine)*. 2017. p. 322–4.
122. Iguchi A, Kitazawa K, Nishimura T, Tanese S, Toubé Y, Kobayashi H, et al. Eight pediatric cases of mamushi bite with administration of antivenom [in Japanese]. Vol. 17, *Nihon Shouni Kyukyu Igakukai Zasshi (Journal of Japanese Society of Emergency Pediatrics)*. 2018. p. 401–7.
123. Shimamoto T, Miyachi M, Kuwahara Y, Ogawa H, Nishimura A, Imai M. A case of pit viper bite complicated by wound infection. *Kyotofuritsu Yosanoumi Byoinshi*. 2012; 9(1):59–63.
124. Terashita S, Murakami M, Saito Y, Hashimoto I, Igarashi N, Tsuhata S. Clinical analysis of childhood pit viper bite in Toyama area [in Japanese]. Vol. 70, *Shonika Rinsho (Japanese Journal of Pediatrics)*. 2017. p. 1308–11.
125. Tsubokura Y, Kume N, Kobe N, Yamazoe T, Masuda N, Yamauchi S, et al. A pediatric case of mamushi bite diagnosed five days after the injury [in Japanese]. Vol. 36, *Nihon Shouni Hifuka Gakkai Zasshi*. 2017. p. 65–9.
126. Hifumi T, Murakawa M, Sakai A, Ginnaga A, Yamamoto A, Ato M, et al. Potentially fatal coagulopathy secondary to yamakagashi (*Rhabdophis tigrinus*) bites that completely recovered with antivenom treatment. *Acute Med Surg*. 2014 Aug 8; 2(2):123–6. <https://doi.org/10.1002/ams2.69> PMID: 29123706
127. Matori S, Miyagi T, Hanashiro H, Sonosaki T, Hayashi K, Awasawa T, et al. Early onset of acute compartment syndrome diagnosed by a simple needle manometer technique [in Japanese]. *Nishi Nihon Hifuka*. 2013; 76(5):454–8.
128. Narasaka T, Suzuki H, Mizokami H, Miura M. A case of whipworm disease complicated by tuberculous peritonitis and detected by colonoscopy [in Japanese]. *Clin Parasitol*. 2012; 23(1):29–31.
129. Ikuno H, Ishikawa T, Norose K. Status of Strongyloidiasis in Japan, 2000–2017. *Am J Trop Med Hyg*. 2020 Aug; 103(2):727–34. <https://doi.org/10.4269/ajtmh.19-0969> PMID: 32588800

130. Schär F, Trostorf U, Giardina F, Khieu V, Muth S, Marti H, et al. Strongyloides stercoralis: Global Distribution and Risk Factors. *PLoS Negl Trop Dis*. 2013; 7(7):e2288. <https://doi.org/10.1371/journal.pntd.0002288> PMID: 23875033
131. Yamanashi H, Kanbara S, Murase K, Maeda T. Eosinophilia, a marker of asymptomatic Strongyloides infection, in a young patient with extrapulmonary tuberculosis. *BMJ Case Rep*. 2018 Jan 4;2018.
132. Inoue K, Ozaka S, Okamoto K, Ogawa R, Mizukami K, Okimoto T, et al. Multiple infections with helminths—whipworm, hookworm, and roundworm. *Endoscopy*. 2014 Mar 27; 46(S 01):E117–8. <https://doi.org/10.1055/s-0034-1364887> PMID: 24676818
133. Sugiyama H, Morishima Y, Kagawa C, Araki J, Iwaki T, Ikuno H, et al. Current Incidence and Contamination Sources of Ascariasis in Japan [in Japanese]. *Shokuhin Eiseigaku Zasshi J Food Hyg Soc Jpn*. 2020; 61(4):103–8.
134. WHO. World Health Organization. 2021 [cited 2021 Nov 5]. Buruli ulcer (Mycobacterium ulcerans infection). Available from: [https://www.who.int/news-room/fact-sheets/detail/buruli-ulcer-\(mycobacterium-ulcerans-infection\)](https://www.who.int/news-room/fact-sheets/detail/buruli-ulcer-(mycobacterium-ulcerans-infection))
135. Yotsu RR, Nakanaga K, Hoshino Y, Suzuki K, Ishii N. Buruli ulcer and current situation in Japan: a new emerging cutaneous Mycobacterium infection. *J Dermatol*. 2012 Jul; 39(7):587–93. <https://doi.org/10.1111/j.1346-8138.2012.01543.x> PMID: 22486235
136. National Institute of Infectious Diseases. National Institute of Infectious Diseases Infectious Agents Surveillance Report. 2018. Infectious Agents Surveillance Report. Available from: <https://www.niid.go.jp/niid/ja/kansennohNoanashi/2913-bu-intro.html>.
137. WHO. The Global Health Observatory, World Health Organization. 2021. Number of new reported cases of Buruli ulcer. Available from: <https://www.who.int/data/gho/data/indicators/indicator-details/GHO/number-of-new-reported-cases-of-buruli-ulcer>.
138. Yasukawa K. Blood donor screening for Trypanosoma cruzi infection in Japan. *Transfusion (Paris)*. 2014; 54(3):745–6. <https://doi.org/10.1111/trf.12505> PMID: 24617589
139. Nara T. Chagas disease [in Japanese]. *Igaku No Ayumi J Clin Exp Med*. 2015; 253(1):119–23.
140. Nara T. Globalization, global warming, and infectious disease control - vector-borne disease, Chagas disease [in Japanese]. Vol. 70, *Shonika Rinsho (Japanese Journal of Pediatrics)*. 2017. p. 2267–71.
141. Coura JR. The main sceneries of Chagas disease transmission. The vectors, blood and oral transmissions—a comprehensive review. *Mem Inst Oswaldo Cruz*. 2015; 110(3):277–82. <https://doi.org/10.1590/0074-0276140362> PMID: 25466622
142. Gascon J, Bern C, Pinazo MJ. Chagas disease in Spain, the United States and other non-endemic countries. *Acta Trop*. 2010 Aug; 115(1–2):22–7. <https://doi.org/10.1016/j.actatropica.2009.07.019> PMID: 19646412
143. Gascon J, Vilasanz R, Lucas A. The need for global collaboration to tackle hidden public health crisis of Chagas disease. *Expert Rev Anti Infect Ther*. 2014; 12(4):393–5. <https://doi.org/10.1586/14787210.2014.896194> PMID: 24579882
144. Miyanaga D, Tama N, Amaya N, Sarasawa K, Ikeda H, Fukuoka Y, et al. A case of Chagas cardiomyopathy with severe heart failure and ventricular tachycardia [in Japanese]. *Shinzo Heart*. 2019; 51(9):932–8.
145. Satoh F, Tachibana H, Hasegawa I, Osawa M. Sudden death caused by chronic Chagas disease in a non-endemic country: Autopsy report. *Pathol Int*. 2010 Mar; 60(3):235–40. <https://doi.org/10.1111/j.1440-1827.2009.02503.x> PMID: 20403051
146. Shintaku M, Takeda S, Miura S, Yutani C, Tsutsumi Y. Chronic Chagastic cardiomyopathy associated with membranoproliferative glomerulonephritis: Report of an autopsy case. *Pathol Int*. 2020; 70(1):47–52. <https://doi.org/10.1111/pin.12883> PMID: 31840862
147. Imai K, Maeda T, Sayama Y, Mikita K, Fujikura Y, Misawa K, et al. Mother-to-child transmission of congenital Chagas disease, Japan. *Emerg Infect Dis*. 2014 Jan; 20(1):146–8. <https://doi.org/10.3201/eid2001.131071> PMID: 24378113
148. Nagumo M, Maeda T, Imai K, Misawa K, Kei M, Fujikura Y, et al. A case report of congenital Chagas' disease in Japan [in Japanese]. *J Natl Def Med Coll*. 2013; 38(3):225–30.
149. Sayama Y, Furui Y, Takakura A, Ishinoda M, Matsumoto C, Taira R, et al. Seroprevalence of Trypanosoma cruzi infection among at-risk blood donors in Japan. *Transfusion (Paris)*. 2019 Jan; 59(1):287–94. <https://doi.org/10.1111/trf.14999> PMID: 30474861
150. Momose S. Safety measures for blood products [in Japanese]. Vol. 44, *Kansensyo (The Infection)*. 2014. p. 97–102,91–92.
151. Hirayama K. Preparedness for Chagas disease [in Japanese]. *Nihon Iji Shimpo Jpn Med J*. 2014; (4723):47.



152. Momose S. A case of blood donation by a person positive to Chagas disease [in Japanese]. *Rinsho Kensagaku Zasshi Med Technol.* 2014; 42(8):766–9.
153. Sukehiro N, Kida N, Umezawa M, Murakami T, Arai N, Jinnai T, et al. First Report on Invasion of Yellow Fever Mosquito, *Aedes aegypti*, at Narita International Airport, Japan in August 2012. *Jpn J Infect Dis.* 2013; 66(3):189–94. <https://doi.org/10.7883/yoken.66.189> PMID: 23698478
154. Mogi M, Tuno N. Impact of climate change on the distribution of *Aedes albopictus* (Diptera: Culicidae) in northern Japan: retrospective analyses. *J Med Entomol.* 2014; 51(3):572–9. <https://doi.org/10.1603/me13178> PMID: 24897849
155. Ohnishi K. Needle-stick dengue virus infection in a health-care worker at a Japanese hospital. *J Occup Health.* 2015; 57(5):482–3. <https://doi.org/10.1539/joh.14-0224-CS> PMID: 26084918
156. Schmidt-Chanasit J, Emmerich P, Tappe D, Gunther S, Schmidt S, Wolff D, et al. Autochthonous dengue virus infection in Japan imported into Germany, September 2013. *Euro Surveill Bull Eur Sur Mal Transm Eur Commun Dis Bull.* 2014 Jan 23; 19(3). <https://doi.org/10.2807/1560-7917.es2014.19.3.20681> PMID: 24480059
157. Ueno R, Nishiura H. Letter to the editor: diagnosis of a single imported dengue case who had traveled to Japan - how serious is it for travelers? *Euro Surveill Bull Eur Sur Mal Transm Eur Commun Dis Bull.* 2014 Feb 27; 19(8):20715.
158. Kobayashi D, Murota K, Fujita R, Itokawa K, Kotaki A, Moi ML, et al. Dengue Virus Infection in *Aedes albopictus* during the 2014 Autochthonous Dengue Outbreak in Tokyo Metropolis, Japan. *Am J Trop Med Hyg.* 2018 May; 98(5):1460–8. <https://doi.org/10.4269/ajtmh.17-0954> PMID: 29557338
159. Nakayama E, Kotaki A, Tajima S, Kawada M, Miura K, Gemma A, et al. Two different dengue virus strains in the Japanese epidemics of 2014. *Virus Genes.* 2016 Oct; 52(5):722–6. <https://doi.org/10.1007/s11262-016-1356-4> PMID: 27229877
160. Seki N, Iwashita Y, Moto R, Kamiya N, Kurita M, Tahara N, et al. An autochthonous outbreak of dengue type 1 in Tokyo, Japan 2014. *Nihon Koshu Eisei Zasshi Jpn J Public Health.* 2015; 62(5):238–50. [https://doi.org/10.11236/jph.62.5\\_238](https://doi.org/10.11236/jph.62.5_238) PMID: 26118707
161. Tajima S, Nakayama E, Kotaki A, Moi ML, Ikeda M, Yagasaki K, et al. Whole Genome Sequencing-Based Molecular Epidemiologic Analysis of Autochthonous Dengue Virus Type 1 Strains Circulating in Japan in 2014. *Jpn J Infect Dis.* 2017 Jan 24; 70(1):45–9. <https://doi.org/10.7883/yoken.JJID.2016.086> PMID: 27169954
162. Quam MB, Sessions O, Kamaraj US, Rocklöv J, Wilder-Smith A. Dissecting Japan's Dengue Outbreak in 2014. *Am J Trop Med Hyg.* 2016 Feb; 94(2):409–12. <https://doi.org/10.4269/ajtmh.15-0468> PMID: 26711518
163. Kondo M, Akachi S, Ando K, Nomura T, Yamanaka K, Mizutani H. Two Japanese siblings affected with Chikungunya fever with different clinical courses: Imported infections from the Cook Islands. *J Dermatol.* 2016 Jun; 43(6):697–700. <https://doi.org/10.1111/1346-8138.13253> PMID: 26813362
164. Takaya S, Kutsuna S, Nakayama E, Taniguchi S, Tajima S, Katanami Y, et al. Chikungunya Fever in Traveler from Angola to Japan, 2016. *Emerg Infect Dis.* 2017 Jan; 23(1):156–8. <https://doi.org/10.3201/eid2301.161395> PMID: 27983938
165. Eimoto A, Nakata T, Aoki M, Oiwa T, Adachi M, Takeuchi M. A case of Chikungunya fever after traveling to India [in Japanese]. Vol. 13, *Nihon Kyukyu Igakukai Chubu Chihokaiishi (Chubu Journal of Acute Medicine)*. 2017. p. 22–4.
166. Imai K, Nakayama E, Maeda T, Mikita K, Kobayashi Y, Mitarai A, et al. Chikungunya Fever in Japan Imported from the Caribbean Islands. *Jpn J Infect Dis.* 2016; 69(2):151–3. <https://doi.org/10.7883/yoken.JJID.2015.063> PMID: 26166501
167. Sasaki Y, Manda S, Sato T, Maeda T, Miyazaki T, Nakanishi K, et al. Chikungunya Virus Infection Presenting with Persistent Arthralgia without Fever. *J Gen Fam Med.* 2015 Oct; 16(3):204–7.
168. Furuichi M, Makie T, Honma Y, Isoda T, Miyake S. Laboratory-Confirmed Dengue Fever and Chikungunya Fever Cases at the Narita Airport Quarantine Station in 2013. *Jpn J Infect Dis.* 2015; 68(2):142–4. <https://doi.org/10.7883/yoken.JJID.2014.242> PMID: 25420667
169. National Institute of Infectious Diseases. Guide to Response and Control of Dengue Fever, Chikungunya Fever, and Other Mosquito-borne Infectious Diseases For local governments [Internet]. 2017. Available from: <https://www.mhlw.go.jp/file/06-Seisakujouhou-10900000-Kenkoukyoku/0000163947.pdf>.
170. Naha Public Health Center. Progress Report on Response to Suspected Dengue Infection in Naha City [Internet]. 2019. Available from: <https://www.city.naha.okinawa.jp/nahahokenjyo/kansensyoubu/kansensyoubetu/denguefever.files/1.pdf>.
171. National Institute of Infectious Diseases. Diagnostic Manual for Chikungunya Virus infection [Internet]. 2013. Available from: <https://www.niid.go.jp/niid/images/lab-manual/CHIKV.v1.1.pdf>.

172. National Institute of Infectious Diseases. Diagnostic Manual for Dengue Virus Infection [Internet]. 2014. Available from: <https://www.niid.go.jp/niid/images/lab-manual/Dengue2014.pdf>.
173. Guo ZH, Kubo M, Kudo M, Nibe K, Horii Y, Nonaka N. Growth and genotypes of *Echinococcus granulosus* found in cattle imported from Australia and fattened in Japan. *Parasitol Int*. 2011 Dec; 60(4):498–502. <https://doi.org/10.1016/j.parint.2011.09.002> PMID: 21930239
174. Vuitton DA, Wang Q, Zhou HX, Raoul F, Knapp J, Bresson-Hadni S, et al. A historical view of alveolar echinococcosis, 160 years after the discovery of the first case in humans: part 1. What have we learnt on the distribution of the disease and on its parasitic agent? *Chin Med J (Engl)*. 2011 Sep; 124(18):2943–53. PMID: 22040507
175. Yagi K. The Control Measures of Alveolar Echinococcosis Conducted by Hokkaido Local Government [in Japanese]. Report of the Hokkaido Institute of Public Health. 2017. p. 1–7.
176. Fukumoto SI, Yamada S, Fushikida M, Toyada S, Nishikawa T, Higuchi H, et al. Natural larval *Echinococcus multilocularis* infection in a Norway rat, *Rattus norvegicus*, captured indoors in Hokkaido, Japan. *J Vet Med Sci*. 2017 Nov; 79(11):1857–60. <https://doi.org/10.1292/jvms.17-0372> PMID: 29021426
177. Goto Y, Sato K, Yahagi K, Komatsu O, Hoshina H, Abiko C, et al. Frequent isolation of *Echinococcus multilocularis* from the livers of racehorses slaughtered in Yamagata, Japan. *Jpn J Infect Dis*. 2010; 63(6):449–51. PMID: 21099100
178. Hifumi T, Ikeda K, Etoh Y, Ikawa K, Nishimura K, Ogawa T, et al. The Relationship between Hepatic Grayish White Solid Nodules Found in Horses Brought to a Slaughterhouse in Fukuoka Prefecture and Larval *Echinococcus multilocularis* Infection. *J Jpn Vet Med Assoc*. 2015; 68(4):253–7.
179. Irie T, Mukai T, Yagi K. *Echinococcus multilocularis* Surveillance Using Copro-DNA and Egg Examination of Shelter Dogs from an Endemic Area in Hokkaido, Japan. *Vector Borne Zoonotic Dis* Larchmt N. 2018; 18(7):390–2. <https://doi.org/10.1089/vbz.2017.2245> PMID: 29652640
180. Irie T, Yamada K, Morishima Y, Yagi K. High probability of pet dogs encountering the sylvatic cycle of *Echinococcus multilocularis* in a rural area in Hokkaido, Japan. *J Vet Med Sci*. 2019 Nov; 81(11):1606–8. <https://doi.org/10.1292/jvms.19-0307> PMID: 31548476
181. Morishima Y, Tomaru Y, Fukumoto SI, Sugiyama H, Yamasaki H, Hashimoto C, et al. Canine Echinococcosis Due to *Echinococcus multilocularis*: a Second Notifiable Case from Mainland Japan. *Jpn J Infect Dis*. 2016 Sep 21; 69(5):448–9. <https://doi.org/10.7883/yoken.JJID.2015.573> PMID: 27357982
182. Yamano K, Kouguchi H, Uruguchi K, Mukai T, Shibata C, Yamamoto H, et al. First detection of *Echinococcus multilocularis* infection in two species of nonhuman primates raised in a zoo: a fatal case in *Cercocebus diana* and a strongly suspected case of spontaneous recovery in *Macaca nigra*. *Parasitol Int*. 2014 Aug; 63(4):621–6. <https://doi.org/10.1016/j.parint.2014.04.006> PMID: 24780141
183. Oikawa E, Shimura R, Nishimura M, Furuoka H. First Case of *Echinococcus multilocularis* Infection in a Zoo-Housed Flying Squirrel (*Pteromys volans orii*). Vol. 75, *The Journal of Veterinary Medical Science*. 2013. p. 659–61. <https://doi.org/10.1292/jvms.12-0455> PMID: 23257604
184. Morishima Y, Sugiyama H, Yamazaki H, Kon M, Hasegawa A, Doi R. Introduction of *Echinococcus* into nonendemic areas by infected domestic animals. 2019;40–2.
185. Yamano K, Yagi K, Morishima Y, Sugiyama H, Yamasaki H. Basics of Laboratory Examinations of Echinococcosis and Intestinal Helminthiasis [in Japanese] [Internet]. National Institute of Infectious Diseases; 2017. Available from: <https://www.niid.go.jp/niid/images/lab-manual/Echinococcus2014Nov.pdf>.
186. Okajima J, Shibata K, Takahashi E, Nagafuchi T, Okajima K, Nonaka N. Current status and its epidemiological consideration of *Fasciola* and *Eurytrema* infections in beef cattle of Japan. *J Vet Med Sci*. 2016 Jun 1; 78(5):785–90. <https://doi.org/10.1292/jvms.15-0469> PMID: 26822002
187. Sugiyama H, SHIBATA K, MORISHIMA Y, MUTO M, YAMASAKI H, KAWAKAMI Y. Current Status of Lung Fluke Metacercarial Infection in Freshwater Crabs in the Kawane Area of Shizuoka Prefecture, Japan. *J Vet Med Sci*. 2013; 75(3):249–53. <https://doi.org/10.1292/jvms.12-0325> PMID: 23076034
188. Yoshida A. Paragonimiasis. *Jpn J Med Pharm Sci*. 2017 Nov; 74(11):1393–8.
189. Ohari Y, Suzuki Y, Shibahara T, Itagaki T. First report of *Paragonimus skrjabini miyazakii* metacercariae in *Geothelphusa dehaani* (Sawagani) occurring in Iwate Prefecture, Japan. *J Vet Med Sci*. 2019 Aug; 81(8):1109–12. <https://doi.org/10.1292/jvms.19-0164> PMID: 31189784
190. Matsuo K, Moribe J, Takashima Y, Kasuya S, Yoshida A, Abe N, et al. Possibility of Paragonimiasis Due to Consumption of Raw Deer Meat. *J Jpn Vet Med Assoc*. 2018; 71(8):449–53.
191. Sugiyama H, Shibata K, Kawakami Y, Arakawa K, Morishima Y, Yamasaki H, et al. Paragonimiasis Due to the Consumption of Wild Boar Meat in Japan: Contamination Levels of Lung Fluke Larvae in Muscle Samples of Wild Boars Caught in Kagoshima Prefecture. *Jpn J Infect Dis*. 2015; 68(6):536–7. <https://doi.org/10.7883/yoken.JJID.2015.280> PMID: 26370424

192. Yatera K, Hanaka M, Hanaka T, Yamasaki K, Nishida C, Kawanami T, et al. A rare case of paragonimiasis miyazakii with lung involvement diagnosed 7 years after infection: A case report and literature review. *Parasitol Int*. 2015; 64(5):274–80. <https://doi.org/10.1016/j.parint.2015.02.009> PMID: 25771073
193. Ohuchi M, Inoue S, Ozaki Y, Fujita T, Ueda K, Hanaoka J. A case of paragonimiasis westermani infection caused by eating raw deer meat. *J Jpn Assoc Chest Surg*. 2014; 28(2):170–6.
194. Banzai A, Sasaki T, Sugiyama H, Kawakami Y. Infection status of *Paragonimus westermani* metacercariae in the Japanese freshwater crab *Geothelphusa dehaani* from the Kobado area of Chiba Prefecture, Japan. *Med Entomol Zool*. 2018; 69(1):1–5.
195. Kita K. African sleeping sickness. *Jpn J Pediatr*. 2017; 70:2283–8.
196. Kawamura Y, Yoshikawa I, Katakura K. Imported leishmaniasis in dogs, US military bases, Japan. *Emerg Infect Dis*. 2010; 16(12):2017–9. <https://doi.org/10.3201/eid1612.100389> PMID: 21122254
197. Sanjoba C, Yusuf O, Asada M, Sumbuu G, Osada Y, Miyagi I, et al. Sandflies of the genus *Phlebotomus* endemic to Japan. *Eisei Dobutsu Med Entomol Zool*. 2010; 61(2):159.
198. Koba A, Mori S, Ishii N. Survey of newly diagnosed Japanese leprosy patients [in Japanese]. *Nihon Hansenbyo Gakkai Zasshi*. 2011 Feb; 80(1):11–6.
199. Takahashi K. Current situations of diverse skin diseases in Okinawa and understanding of disease contexts [in Japanese]. Vol. 88, *Nihon Hansenbyo Gakkai Zasshi (Japanese Journal of Leprosy)*. 2019. p. 39–41.
200. Ozaki M, Tomoda M. Conjugal leprosy infection in Japan—case report and review [in Japanese]. *Nihon Hansenbyo Gakkai Zasshi*. 2012 Apr; 81(1–2):135–43.
201. Namisato M, Fujiwara T. Two cases of leprosy who had drug resistance related mutations to diaphenylsulfone, rifampicin and new quinolone [in Japanese]. *Nihon Hansenbyo Gakkai Zasshi*. 2018; 86(3):181–7.
202. Koike H, Hashimoto R, Tomita M, Kawagashira Y, Iijima M, Nagamatsu M, et al. The Wide Range of Clinical Manifestations in Leprous Neuropathy: Two Case Reports. Vol. 50, *Internal Medicine*. 2011. p. 2223–6. <https://doi.org/10.2169/internalmedicine.50.5604> PMID: 21963745
203. Fukai K, Komatsu K, Matsuo Y, Hayashi K, Kariya Y, Miyagi T, et al. Two cases of squamous cell carcinoma arising on refractory skin ulcers in patients with a history of Hansen's disease [in Japanese]. *Nishi Nihon Hifuka*. 2019; 81(2):115–9.
204. Ishida Y, Inoue T, Tsuchiya I, Maeda M, Hirano A. Two cases of leprosy related conditions and relevant issues on medical services for ex-leprosy patients who live in communities in Japan [in Japanese]. *Nihon Hansenbyo Gakkai Zasshi*. 2010 Feb; 79(1):3–10.
205. Baba M, Nurse and Care Staff in Handicapped Person's Ward, NST Committee, Bedsore Committee. Successful team medicine to preserve foot function in intractable ulcer complicated by diabetes and the sequelae of Hansen's disease [in Japanese]. *Jpn J Foot Care*. 2017; 15(3):135–8.
206. Joko S, Horie D. A case of a patient with a history of leprosy-related uveitis to whom cataract surgery was performed after phototherapeutic keratectomy [in Japanese]. Vol. 24, *Ganka Syuzyutsu (Japanese Journal of Ophthalmic Surgery)*. 2011. p. 199–203.
207. Shigeyasu C, Nakashima T, Keino H, Ikeda K, Yamane みお, Horie D, et al. Clinical Science: State of Ocular Sequelae and Visual Dysfunction in Individuals with Hansen's Disease [in Japanese]. Vol. 123, *J Jpn Ophthalmol Soc*. 2019. p. 51–7.
208. Ishizaki T, Ogura S, Yamada M, Shiroy T, Takamori H. Experience of implant treatment in a leprosy sanatorium [in Japanese]. Vol. 10, *Japanese Journal of Maxillo Facial Implants*. 2011. p. 231–5.
209. Iwata M, Matsumura Y, Ozaki M, Nakanaga K, Hoshino Y, Ishii N, et al. Relapsed Leprosy with Infiltrative Ring-shaped Erythematous Plaques Seen in a Brazilian 16 Years after Multi-drug Therapy [in Japanese]. *Hifu No Kagaku*. 2014; 13(6):426–30.
210. Inaba T. Historical Overview of Leprosy Control in Japan [in Japanese]. *Kokuritsu Hansenbyo Shiryo-kan Kenkyu Kiyo (Research Bulletin, National Hansen's Disease Museum)*. 2019. p. 1–15.
211. Makino M. Learning from the history of leprosy—looking back at one hundred years of medicine at the leprosaria [in Japanese]. *Nihon Hansenbyo Gakkai Zasshi*. 2010 Feb; 79(1):25–36.
212. Mori S, Ato M, Ishii N. A Study on the Entering and Out-going Trends at Japan's National Hansen's Disease Sanatoriums [in Japanese]. *Nihon Hansenbyo Gakkai Zasshi*. 2019; 88(2):53–75.
213. Fuzisaki M. What does psychiatry learn from the fight of leprosy patients? [in Japanese]. Vol. 59, *Byoin Chiiki Seishin Igaku (Jpn. J. Hospital & Community Psychi)*. 2016. p. 22–4.
214. Masubuchi Y, Takayama H, Isogai R. How did people living in the leprosy sanatoria satisfy their needs? [in Japanese]. *Nihon Kango Gakkai Ronbunshu: Seizin Kango II*. 2010. p. 251–3.

215. Yokose R. The suffering of female ex-patients: from the narratives of women who have recovered from Hansen's disease [in Japanese]. *Bioethics*. 2013; 23(1):54–62.
216. Yokose R. The continued suffering of recovered Hansen's Disease patients with regards to their future despite having achieved their rehabilitation: Narratives by those who left Hansen's disease sanatoriums with regards to their later abode [in Japanese]. *Bioethics*. 2014; 24(1):126–35.
217. Yokota Y. Leprosy and human rights: trends in Japan and in the world [in Japanese]. *Nihon Hansenbyo Gakkai Zasshi*. 2014; 83(3):125–9.
218. Goto M, Nogam R, Okano Y, Gidoh M, Yotsu R, Ishida Y, et al. Guidelines for the treatment of Hansen's disease in Japan (third edition) [in Japanese]. *Nihon Hansen Gakkai Zasshi Jpn J Lepr Off Organ Jpn Lepr Assoc*. 2013 Dec; 82(3):143–84.
219. Yotsu R, Suzuki K, Mori S, Ishii N. Diagnosis of Hansen's disease [in Japanese]. *Nihon Hansenbyo Gakkai Zasshi*. 2011; 80(1):59–70.
220. Ishii N. Hansen's disease and dermatology [in Japanese]. Vol. 81, *Nishi Nihon Hifuka (The Nishinihon Journal of Dermatology)*. 2019. p. 461–4.
221. Ozaki M. Challenges of medical services for leprosy: reflection on the transition of medicines for treatment [in Japanese]. *Nihon Hansenbyo Gakkai Zasshi*. 2018; 87(2):71–2.
222. Kobayashi T. The Control of Lymphatic Filariasis in Japan. *Jpn J Hist Pharm*. 2019; 54(2):83–8.
223. Yotsu R. New dermatology seminarium - Skin infectious diseases to be aware of zoonosis and tropical skin diseases [in Japanese]. Vol. 130, *Nihon Hifuka Gakkai Zasshi (The Japanese Journal of Dermatology)*. 2020. p. 2355–60.
224. Mochizuki T, Tsuboi Y, Igarashi K, Ishizaki J, Ushigami T, Ogawa H, et al. Japanese Society of Dermatology Guidelines for the treatment of dermatomycosis 2019 [in Japanese]. Vol. 129, *Nihon Hifuka Gakkai Zasshi (The Japanese Journal of Dermatology)*. 2019. p. 2639–73.
225. Suzuki R, Yikelamu A, Tanaka R, Igawa K, Yokozeki H, Yaguchi T. Studies in Phylogeny, Development of Rapid Identification Methods, Antifungal Susceptibility, and Growth Rates of Clinical Strains of *Sporothrix schenckii* Complex in Japan. *Med Mycol J*. 2016; 57(3):E47–57.
226. Kusuvara M. Skin diseases common in Kyushu Region sporotrichosis and chromomycosis in Kyushu and Okinawa Region [in Japanese]. Vol. 29, *Nihon Rinho Hifuka Ikai Zasshi (Journal of the Japan Organization of Clinical Dermatologists)*. 2012. p. 773–7.
227. Watanabe T, Kamei K. Current status of imported fungal infections and countermeasures [in Japanese]. *Nihon Naika Gakkai Zasshi (The Journal of the Japanese Society of Internal Medicine)*. 2014. p. 2074–679.
228. Fukuda M, Uni S, Otsuka Y, Eshita Y, Nakatani J, Ihara K, et al. A new case of zoonotic onchocercosis in northern Kyushu, Japan. *Parasitol Int*. 2015 Dec; 64(6):519–21.
229. Fukuda M, Otsuka Y, Uni S, Boda T, Daisaku H, Hasegawa H, et al. Zoonotic onchocerciasis in Hiroshima, Japan, and molecular analysis of a paraffin section of the agent for a reliable identification. *Parasite Paris Fr*. 2011 May; 18(2):185–8. <https://doi.org/10.1051/parasite/2011182185> PMID: 21678795
230. Fukuda M, Otsuka Y, Uni S, Bain O, Takaoka H. Genetic evidence for the presence of two species of *Onchocerca* from the wild boar in Japan. *Parasite Paris Fr*. 2010 Mar; 17(1):33–7. <https://doi.org/10.1051/parasite/2010171033> PMID: 20387736
231. Uni S, Fukuda M, Ogawa K, Lim YAL, Agatsuma T, Bunchom N, et al. Zoonotic infection with *Onchocerca dewittei japonica* in an 11-year-old boy in Kansai Region, Western Honshu, Japan. *Parasitol Int*. 2017 Oct; 66(5):593–5. <https://doi.org/10.1016/j.parint.2017.06.006> PMID: 28648713
232. Uni S, Fukuda M, Otsuka Y, Hiramatsu N, Yokobayashi K, Takahashi H, et al. New zoonotic cases of *Onchocerca dewittei japonica* (Nematoda: Onchocercidae) in Honshu, Japan. *Parasit Vectors*. 2015 Jan 27; 8:59. <https://doi.org/10.1186/s13071-015-0655-2> PMID: 25623081
233. Malerczyk C, Detora L, Gniel D. Imported human rabies cases in Europe, the United States, and Japan, 1990 to 2010. *J Travel Med*. 2011 Dec; 18(6):402–7. <https://doi.org/10.1111/j.1708-8305.2011.00557.x> PMID: 22017716
234. Nosaki Y, Maeda K, Watanabe M, Yokoi T, Iwai K, Noguchi A, et al. Fourth imported rabies case since the eradication of rabies in Japan in 1957. *J Travel Med*. 2021 Sep 20;taab151. <https://doi.org/10.1093/jtm/taab151> PMID: 34542626
235. Kashino W, Piyaphanee W, Kittittrakul C, Tangpukdee N, Sibunruang S, Lawpoolsri S, et al. Incidence of potential rabies exposure among Japanese expatriates and travelers in Thailand. *J Travel Med*. 2014 Aug; 21(4):240–7. <https://doi.org/10.1111/jtm.12124> PMID: 24845015
236. Miyazu M, Kikuchi H, Goto Y, Yamamoto E. Rabies Postexposure prophylaxis [in Japanese]. Vol. 7, *Nihon Tokouigakkaishi (Journal of Japanese Society of travel and Health)*. 2014. p. 35–9.

237. Yuhji Kuroda. Importance of Vaccines from the Viewpoint of Imported Infectious Diseases About Rabies [in Japanese]. *Nihonijishinpo Jpn Med J*. 2016;(4789):27–33.
238. Takayama N, Suganuma A, Yanagisawa N, Nakayama E. Trends of patients seeking post-exposure prophylaxis at our hospital: exposure and consultations abroad [in Japanese]. Vol. 143, *Nihon Ishikai Zashi*. 2014. p. 1529–33.
239. Inoue S. Rabies Guideline in Japan 2013 [in Japanese]. Vol. 67, *Jyuui Chikusan Shinpou*. 2014. p. 171–5.
240. Takahashi-Omoe H, Omoe K, Okabe N. Regulatory systems for prevention and control of rabies, Japan. *Emerg Infect Dis*. 2008 Sep; 14(9):1368–74. <https://doi.org/10.3201/eid1409.070845> PMID: 18760002
241. Watanabe I, Yamada K, Aso A, Suda O, Matsumoto T, Yahiro T, et al. Relationship between virus-neutralizing antibody levels and the number of rabies vaccinations: a prospective study of dogs in Japan. *Jpn J Infect Dis*. 2013; 66(1):17–21. <https://doi.org/10.7883/yoken.66.17> PMID: 23429079
242. Hidano A, Hayama Y, Tsutsui T. Prevalence of immunity presumed using rabies vaccination history and household factors associated with vaccination status among domestic dogs in Japan. *Jpn J Infect Dis*. 2012; 65(5):396–402. <https://doi.org/10.7883/yoken.65.396> PMID: 22996212
243. Matsumoto N, Ida M. Research on rabies virus antibody level in dogs [in Japanese]. *Tottori ken eisei Kankyo kenkyushohou*. 2010. p. 5–7.
244. Saeki J, Yamamoto S, Yabe M, Nagasaki J, Hayashi K. Survey of rabies antibody prevalence in young dogs younger than 91 days [in Japanese]. Vol. 68, *Nihon Jyuuisikai zassi*. 2015. p. 135–40.
245. Kwan NCL, Ogawa H, Yamada A, Sugiura K. Quantitative risk assessment of the introduction of rabies into Japan through the illegal landing of dogs from Russian fishing boats in the ports of Hokkaido, Japan. *Prev Vet Med*. 2016 Jun 1; 128:112–23. <https://doi.org/10.1016/j.prevetmed.2016.04.015> PMID: 27237397
246. Kwan NCL, Sugiura K, Hosoi Y, Yamada A, Snary EL. Quantitative risk assessment of the introduction of rabies into Japan through the importation of dogs and cats worldwide. *Epidemiol Infect*. 2017; 145(6):1168–82. <https://doi.org/10.1017/S0950268816002995> PMID: 28095930
247. Kadowaki H, Hampson K, Tojinbara K, Yamada A, Makita K. The risk of rabies spread in Japan: a mathematical modelling assessment. *Epidemiol Infect*. 2018 Jul; 146(10):1245–52. <https://doi.org/10.1017/S0950268818001267> PMID: 29781416
248. Kwan NCL, Inoue M, Yamada A, Sugiura K. Evaluating the contact rate between companion dogs during dog walking and the practices towards potential cases of rabies among dog owners in Japan. *Zoonoses Public Health*. 2019 Jun; 66(4):393–400. <https://doi.org/10.1111/zph.12573> PMID: 30810290
249. Kwan NCL, Yamada A, Sugiura K. Benefit-cost analysis of the policy of mandatory annual rabies vaccination of domestic dogs in rabies-free Japan. *PLoS One*. 2018; 13(12):e0206717. <https://doi.org/10.1371/journal.pone.0206717> PMID: 30557398
250. Yamada A, Makita K, Kadowaki H, Ito N, Sugiyama M, Kwan NCL, et al. A Comparative Review of Prevention of Rabies Incursion between Japan and Other Rabies-Free Countries or Regions. *Jpn J Infect Dis*. 2019 Jul 24; 72(4):203–10. <https://doi.org/10.7883/yoken.JJID.2018.431> PMID: 30584198
251. Executive Committee of Guideline for the Diagnosis and Treatment of Scabies. Guideline for the diagnosis and treatment of scabies in Japan (third edition): Executive Committee of Guideline for the Diagnosis and Treatment of Scabies. *J Dermatol*. 2017 Sep;44(9):991–1014.
252. Tanaka H, Tsuji M. From discovery to eradication of schistosomiasis in Japan: 1847–1996. *Int J Parasitol*. 1997 Dec; 27(12):1465–80. [https://doi.org/10.1016/s0020-7519\(97\)00183-5](https://doi.org/10.1016/s0020-7519(97)00183-5) PMID: 9467732
253. Kirinoki M, Hayashi N, Chigusa Y. Schistosomiasis [in Japanese]. Vol. 42, *Dokkyo Journal of Medical Sciences*. 2015. p. 233–7.
254. Sakai Y, Iwamoto K, Tanaka M, Yamada K. A case of rectal cancer with ova of *Schistosoma japonicum*. *Gastroenterol Endosc*. 2007; 49(9):2504–10.
255. Imai J, Ichikawa H, Mizukami H, Suzuki T, Watanabe N, Mine T, et al. Colonic High-grade Tubular Adenomas Associated with *Schistosoma japonicum* [in Japanese]. Vol. 41, *The Tokai Journal of Experimental and Clinical Medicine*. 2016. p. 22–3.
256. Nihei N. Focused on distribution and monitoring of *Oncomelania nosophora* in Japan [in Japanese]. Vol. 63, *Medical Entomology and Zoology*. 2012. p. 249–56.
257. Minai M. *Oncomelania nosophora* in Kofu basin, Yamanashi Prefecture, Japan [in Japanese]. Vol. 63, *Medical Entomology and Zoology*. 2012. p. 257–62.
258. Nihei N, Kirinoki M, Koen H, Tsuyuguchi T, Saito Y, Taira K, et al. Changes in the habitat of *Oncomelania hupensis nosophora*, the intermediate host snail of *Schistosoma japonicum*, along the Obitsu River basin, Chiba Prefecture, Japan [in Japanese]. Vol. 69, *Medical Entomology and Zoology*. 2018. p. 19–29.

259. Sakai A. Snakes and snake venom [in Japanese]. Vol. 74, *Koushueisei (The Journal of Public Health Practice)*. 2010. p. 377–81.
260. Sakai A. Diagnosis and treatment of snakebite by Mamushi and Yamakagashi [in Japanese]. *Chudoku Kenkyu Jpn J Toxicol*. 2013 Sep; 26(3):193–9.
261. Yasunaga H, Horiguchi H, Kuwabara K, Hashimoto H, Matsuda S. Short report: venomous snake bites in Japan. *Am J Trop Med Hyg*. 2011 Jan; 84(1):135–6. <https://doi.org/10.4269/ajtmh.2011.10-0403> PMID: 21212215
262. Hifumi T, Sakai A, Yamamoto A, Murakawa M, Ato M, Shibayama K, et al. Clinical characteristics of yamakagashi (*Rhabdophis tigrinus*) bites: a national survey in Japan, 2000–2013. *J Intensive Care*. 2014; 2(1):19. <https://doi.org/10.1186/2052-0492-2-19> PMID: 25908983
263. Hifumi T, Sakai A, Yamamoto A, Murakawa M, Ato M, Shibayama K, et al. Effect of antivenom therapy of *Rhabdophis tigrinus* (Yamakagashi snake) bites. *J Intensive Care*. 2014; 2(1):44. <https://doi.org/10.1186/s40560-014-0044-5> PMID: 25520846
264. Yokoi H, Sakai A, Kodama T, Magome S, Nagayasu T, Tawara M, et al. Severe hypofibrinogenemia in patients bitten by *Gloydius tsushimaensis* in Tsushima Island, Nagasaki, Japan, and treatment strategy. *Toxicon*. 2020 Dec; 188:142–9. <https://doi.org/10.1016/j.toxicon.2020.10.027> PMID: 33130186
265. Izumi Y, Terada K, Morine N, Kudaka J. Epidemiology of venomous snakebite in Okinawa prefecture in 2014 [in Japanese]. *Okinawaken Eiseikankyo Kenkyuzyoho (Annual Report of Okinawa Prefectural Institute of Health and Environment)*. 2015. p. 81–3.
266. Uezu Y, Mahoe Y, Terada T, Morine N, Kudaka J. Epidemiology of venomous snakebite in Okinawa Prefecture in 2012 [in Japanese]. *Okinawaken Eiseikankyo Kenkyuzyoho (Annual Report of Okinawa Prefectural Institute of Health and Environment)*. 2013. p. 79–81.
267. Uezu Y, Terada K, Morine N, Kudaka J. Epidemiology of venomous snakebite in Okinawa Prefecture in 2013 [in Japanese]. *Okinawaken Eiseikankyo Kenkyuzyoho (Annual Report of Okinawa Prefectural Institute of Health and Environment)*. 2014. p. 75–7.
268. Shirokawa M, Seki K, Nakajima Y, Koyama S, Mitsusada M. Patient without neurotoxic symptom after being bitten by an eastern green Mamba (*Dendroaspis angusticeps*). *Nihon Kyukyu Igakukai Zasshi*. 2011; 22(9):777–81.
269. Hifumi T, Sakai A, Kondo Y, Yamamoto A, Morine N, Ato M, et al. Venomous snake bites: clinical diagnosis and treatment. *J Intensive Care*. 2015 Apr 1; 3(1):16. <https://doi.org/10.1186/s40560-015-0081-8> PMID: 25866646
270. Hifumi T. Clinical serum therapy [in Japanese]. Vol. 25, *Nihon Syuchu Chiryu Igakukai Zasshi (Journal of the Japanese Society of Intensive Care Medicine)*. 2018. p. 235–42.
271. Taki K, Ariyoshi K, Sakai A, Ishikawa H, Nakashima K, Endoh Y. Analysis of viper bites by the national survey [in Japanese]. *J Jpn Soc Emerg Med*. 2014; 17(6):753–60.
272. Mogi M, Murate W, Sakai R, Suzuki K, Matsunaga K. Clinical study of 22 viper bite cases at our hospital [in Japanese]. *Hifu No Kagaku*. 2017; 16(2):113–9.
273. Tsujimoto T, Chishiro T, Kotani Y, Kamei J, Yamada Y. Analysis of 38 Mamushi pit viper bite cases where patients did not receive serum antitoxin [in Japanese]. Vol. 28, *Journal of Japanese Association for Acute Medicine*. 2017. p. 48–54.
274. Imamura T, Takemoto M, Kouno H, Ito T. Case report: a case of edema of the right upper extremity after a Mamushi bite that was treated using Goreisan [in Japanese]. Vol. 64, *Bouei Eisei (National Defense Medical Journal)*. 2017. p. 275–9.
275. Masui D, Fukahori S, Kurahachi T, Sakamoto S, Higashidate N, Naoki H, et al. A case of focal lesion after a viper bite successfully treated with herbal medicine. *Nihon Shouni Kyukyu Igakukai Zasshi J Jpn Soc Emerg Pediatr*. 2020; 19(2):190–4.
276. Nakae H. Two cases of viper bite envenomation treated with Saireito [in Japanese]. *Kampo Med*. 2013; 64(4):216–21.
277. Nakae H, Igarashi T. A case of lymphedema of the arm after viper venom successfully treated with traditional Japanese medicines [in Japanese]. Vol. 61, *Japanese Society of Occupational Medicine and Traumatology*. 2013. p. 204–7.
278. Hasegawa M, Pilotte N, Kikuchi M, Means AR, Papaikovou M, Gonzalez AM, et al. What does soil-transmitted helminth elimination look like? Results from a targeted molecular detection survey in Japan. *Parasit Vectors*. 2020 Jan 8; 13(1):6. <https://doi.org/10.1186/s13071-019-3875-z> PMID: 31915050
279. Sasaki Y, Taniguchi T, Kinjo M, McGill RL, McGill AT, Tsuha S, et al. Meningitis associated with strongyloidiasis in an area endemic for strongyloidiasis and human T-lymphotropic virus-1: a single-center experience in Japan between 1990 and 2010. *Infection*. 2013 Dec; 41(6):1189–93. <https://doi.org/10.1007/s15010-013-0483-2> PMID: 23761268

280. Nishi Y, Fukushima T, Nomura S, Tomoyose T, Nakachi S, Morichika K, et al. Characterization of patients with aggressive adult T-cell leukemia-lymphoma in Okinawa, Japan: a retrospective analysis of a large cohort. *Int J Hematol*. 2016 Oct; 104(4):468–75. <https://doi.org/10.1007/s12185-016-2042-y> PMID: 27329124
281. Tanaka T, Hirata T, Parrott G, Higashiarakawa M, Kinjo T, Kinjo T, et al. Relationship Among Strongyloides stercoralis Infection, Human T-Cell Lymphotropic Virus Type 1 Infection, and Cancer: A 24-Year Cohort Inpatient Study in Okinawa, Japan. *Am J Trop Med Hyg*. 2016 Feb; 94(2):365–70. <https://doi.org/10.4269/ajtmh.15-0556> PMID: 26621566
282. Ishikawa S, Maeda T, Hattori K, Watanabe T, Kuramoto T, Ueno S, et al. A case of adenocarcinoma developed in the small intestine with chronic strongyloidiasis. *Clin J Gastroenterol*. 2017 Dec; 10(6):519–23. <https://doi.org/10.1007/s12328-017-0783-7> PMID: 28988405
283. Nabeya D, Haranaga S, Parrott GL, Kinjo T, Nahar S, Tanaka T, et al. Pulmonary strongyloidiasis: assessment between manifestation and radiological findings in 16 severe strongyloidiasis cases. *BMC Infect Dis*. 2017 May 2; 17(1):320. <https://doi.org/10.1186/s12879-017-2430-9> PMID: 28464844
284. Hosoda T, Sakamoto M, Orikasa H, Kubomura A, Misaki T, Okabe N. Septic Meningitis and Liver Abscess due to Hypermucoviscous Klebsiella pneumoniae Complicated with Chronic Strongyloidiasis in a Human T-lymphotropic Virus 1 Carrier. *Intern Med Tokyo Jpn*. 2020 Jan 1; 59(1):129–33.
285. Mukaigawara M, Narita M, Shiiki S, Takayama Y, Takakura S, Kishaba T. Clinical Characteristics of Disseminated Strongyloidiasis, Japan, 1975–2017. *Emerg Infect Dis*. 2020 Mar; 26(3):401–8. <https://doi.org/10.3201/eid2603.190571> PMID: 32091375
286. Kobayashi A, Hara T, Kajima J. Historical aspects for the control of soil-transmitted helminthiasis. *Parasitol Int*. 2006; 55:S289–91. <https://doi.org/10.1016/j.parint.2005.11.042> PMID: 16376139
287. The Tokyo Health Service Association, 2018. Available from: <https://www.yobouigaku-tokyo.or.jp/nenpo/pdf/2018/10.pdf>.
288. Hara W, Ohji S, Mitsui T, Fukahori H, Nomura K. A nepalese case in Japan: neurocysticercosis with a solitary nodular brain lesion that had difficulty distinguishing it from cerebral tuberculoma [in Japanese]. Vol. 30, *Shinkeichiryogaku*. 2013. p. 45–50.
289. Kawajiri S, Yamauchi T, Kitai R, Arai T, Higashino Y, Tsunetoshi K, et al. A case of cysticercosis showing peculiar MRI image changes [in Japanese]. Vol. 41, *CIkenkyu*. 2019. p. 37–40.
290. Sato A, Nakamura I, Fujita H, Fukushima S, Mizuno Y, Fujii T, et al. Neurocysticercosis with Diplopia Responds Well to Albendazole. Vol. 55, *Internal Medicine*. 2016. p. 1219–22. <https://doi.org/10.2169/internalmedicine.55.6176> PMID: 27150884
291. Shoji H, Hirai T, Ishikura T, Takuma T, Okino T, Wakatsuki Y, et al. A case of cysticercosis with multiple lesions in the brain and femoral muscles [in Japanese]. Vol. 87, *Kansenshogaku Zasshi. The Journal of the Japanese Association for Infectious Diseases*. 2013. p. 608–12.
292. Yamasaki H, Sugiyama H, Morishima Y, Ohmae H, Shiinogi S, Okuyama K, et al. A case of racemose neurocysticercosis Racemose [in Japanese]. Vol. 21, *Clinical Parasitology*. 2011. p. 29–32.
293. Yokota K, Furukawa K. A Case of Cysticercosis with Multiple Intracerebral and Intramuscular Nodular Lesions [in Japanese]. Vol. 86, *Kansenshogaku Zasshi. The Journal of the Japanese Association for Infectious Diseases*. 2012. p. 27–30.
294. Yanagida T, Sako Y, Nakao M, Nakaya K, Ito A. Taeniasis and cysticercosis due to Taenia solium in Japan. *Parasit Vectors*. 2012 Jan 17; 5:18. <https://doi.org/10.1186/1756-3305-5-18> PMID: 22248435
295. Braae UC, Hung NM, Satrija F, Khieu V, Zhou XN, Willingham AL. Porcine cysticercosis (Taenia solium and Taenia asiatica): mapping occurrence and areas potentially at risk in East and Southeast Asia. *Parasit Vectors*. 2018 Nov 29; 11(1):613. <https://doi.org/10.1186/s13071-018-3203-z> PMID: 30497522
296. Terauchi M. A recent case report of acute trachoma [in Japanese]. *Ibarakiken Rinshoigaku Zasshi*. 1984. p. 207.
297. National Institute of Infectious Diseases, Japan. National Institute of Infectious Diseases Infectious Agents Surveillance Report [in Japanese] [Internet]. 2019 [cited 2021 Jan 25]. Available from: <https://www.niid.go.jp/niid/ja/ydata/9005-report-jb2018.html>.
298. Iijima W, Inoue H, Ichikawa T. Introducing activities of the Archives of Infectious Diseases History (AIDH) project: Historical epidemiology. *Trop Med Health*. 2021 Jan 27; 49(1):9. <https://doi.org/10.1186/s41182-020-00296-7> PMID: 33504357
299. Kikuchi I. Hansen's disease in Japan: a brief history. *Int J Dermatol*. 1997 Aug; 36(8):629–33. <https://doi.org/10.1046/j.1365-4362.1997.00230.x> PMID: 9329899
300. Koba A, Ishii N, Mori S, Fine PEM. The decline of leprosy in Japan: patterns and trends 1964–2008. *Lepr Rev*. 2009 Dec; 80(4):432–40.

301. Miyashita. Legal and social measures against Trachoma in Japan. *Br J Ophthalmol*. 1935 Jun;19(6):323–5.
302. Tada I. Parasite controls in Japan with emphasis on special characteristics. *Trop Med Health*. 2008; 3 (Supple 2008):49–68.
303. Yotsu RR, Miyamoto Y, Mori S, Ato M, Sugawara-Mikami M, Yamaguchi S, et al. Hansen's disease (leprosy) in Japan, 1947–2020: an epidemiologic study during the declining phase to elimination. *Int J Infect Dis*. 2022 Dec 1; 125:265–74. <https://doi.org/10.1016/j.ijid.2022.10.027> PMID: 36280096
304. Molyneux DH, Hotez PJ, Fenwick A. 'Rapid-impact interventions': how a policy of integrated control for Africa's neglected tropical diseases could benefit the poor. *PLoS Med*. 2005 Nov; 2(11):e336. <https://doi.org/10.1371/journal.pmed.0020336> PMID: 16212468
305. Molyneux DH, Asamoah-Bah A, Fenwick A, Savioli L, Hotez P. The history of the neglected tropical disease movement. *Trans R Soc Trop Med Hyg*. 2021 Jan 28; 115(2):169–75. <https://doi.org/10.1093/trstmh/tra015> PMID: 33508096
306. National Statistics Center. Portal Site of Official Statistics of Japan. [cited 2022 Dec 15]. Statistics of Foreign Residents in Japan. Available from: <https://www.e-stat.go.jp/stat-search/files?page=1&layout=datalist&toukei=00250012&tstat=000001018034&cycle=1&tclass1=000001060399&tclass2val=0>.
307. Higuchi M, Endo M, Yoshino A. Factors associated with access to health care among foreign residents living in Aichi Prefecture, Japan: secondary data analysis. *Int J Equity Health*. 2021 Jun 10; 20(1):135. <https://doi.org/10.1186/s12939-021-01465-8> PMID: 34112160
308. Kobori E, Maeda Y, Yamamoto T. Mortality rates of foreign national residents in Japan: comparison with the Japanese population and a possible healthy migrant effect [in Japanese]. *Nihon Koshu Eisei Zasshi Jpn J Public Health*. 2017; 64(12):707–17.
309. Faber WR, Arias-Bouda LM, Zeegelaar JE, Kolk AH, Fonteyne PA, Toonstra J, et al. First reported case of *Mycobacterium ulcerans* infection in a patient from China. *Trans R Soc Trop Med Hyg*. 2000; 94(3):277–9. [https://doi.org/10.1016/s0035-9203\(00\)90320-1](https://doi.org/10.1016/s0035-9203(00)90320-1) PMID: 10974998
310. Doi R, Matsuda H, Uchida A, Kanda E, Kamiya H, Konno K, et al. Possibility of invasion of *Echinococcus* into Honshu with pet dogs from Hokkaido and overseas [in Japanese]. *Nihon Koshu Eisei Zasshi Jpn J Public Health*. 2003; 50(7):639–49.
311. Ben Salah A, Ben Messaoud N, Guedri E, Zaatour A, Ben Alaya N, Bettaieb J, et al. Topical Paromomycin with or without Gentamicin for Cutaneous Leishmaniasis. *N Engl J Med*. 2013 Feb 7; 368(6):524–32. <https://doi.org/10.1056/NEJMoa1202657> PMID: 23388004
312. National Institute of Public Health of Japan. Japan Registry of Clinical Trials. 2019 [cited 2021 Dec 9]. Efficacy and safety of triclabendazole for the treatment of fasciolosis. Available from: <https://jrct.niph.go.jp/en-latest-detail/jRCTs071190020>.
